# Supplementary material for: Synthesis and Chemopreventive Potential of 5-FU/Genistein Hybrids on Colorectal Cancer Cells
Source: MDPI journal article supplement (doi:10.3390/ph15101299), 2022-10-21
Supplement: s1 [file s1]

# Supplementary Data

## Synthesis and Chemopreventive Potential of 5-FU/Genistein Hybrids on Colorectal Cancer Cells

Gustavo Moreno-Q <sup>1,†</sup>, Wilson Castrillón-L <sup>1,†</sup>, Angie Herrera-R <sup>1,2,\*</sup>, Andrés F. Yepes <sup>1</sup>, Jorge Quintero-Saumeth<sup>1</sup>, Wilson Cardona-G <sup>1\*</sup>

<sup>1</sup> Chemistry of Colombian Plants group, Institute of Chemistry, Faculty of Exact and Natural Sciences, University of Antioquia, Calle 70 No. 52–21, A.A 1226, Medellín, Colombia;

<sup>2</sup> Medical and Experimental Mycology Group, Corporación para Investigaciones Biológicas, 050034, Medellín, Colombia;

\* Correspondence: angie.herrerar@udea.edu.co (A.H.-R.); wilson.cardona1@udea.edu.co (W.C.-G).

|                                                    |           |
|----------------------------------------------------|-----------|
| <sup>1</sup> H, <sup>13</sup> C NMR and MS spectra | Figure S1 |
| HPLC analysis                                      | Figure S2 |

**Figure S1. <sup>1</sup>H, <sup>13</sup>C NMR and MS spectra**

5-fluoro-1-((1-(3-((5-hydroxy-3-(4-hydroxyphenyl)-4-oxo-4H-chromen-7-yl)oxy)ethyl)-1H-1,2,3-triazol-4-yl)methyl)pyrimidine-2,4(1H,3H)-dione (4a)

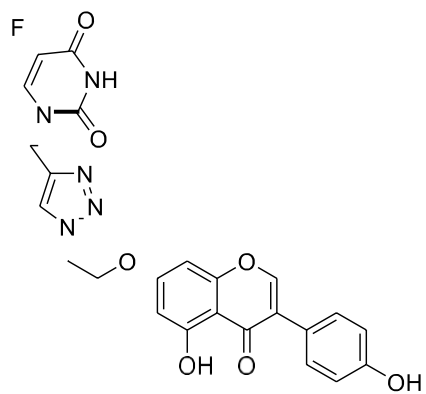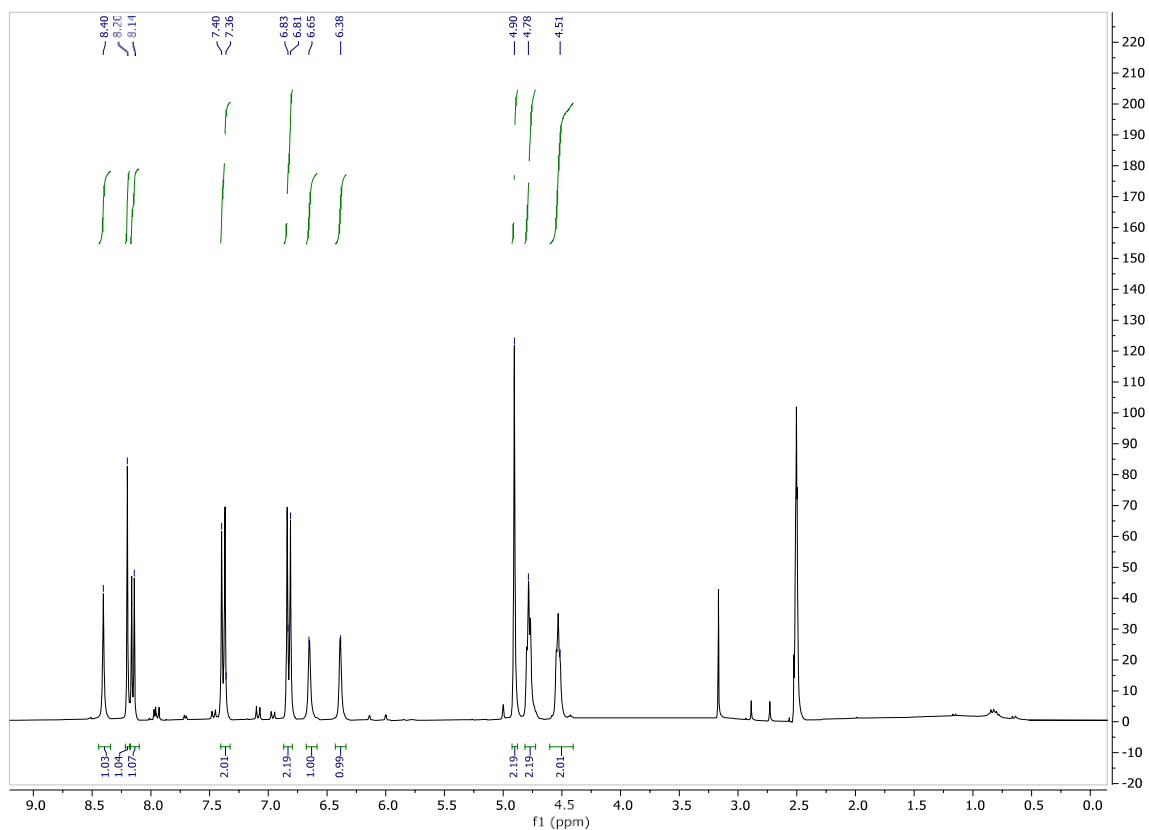

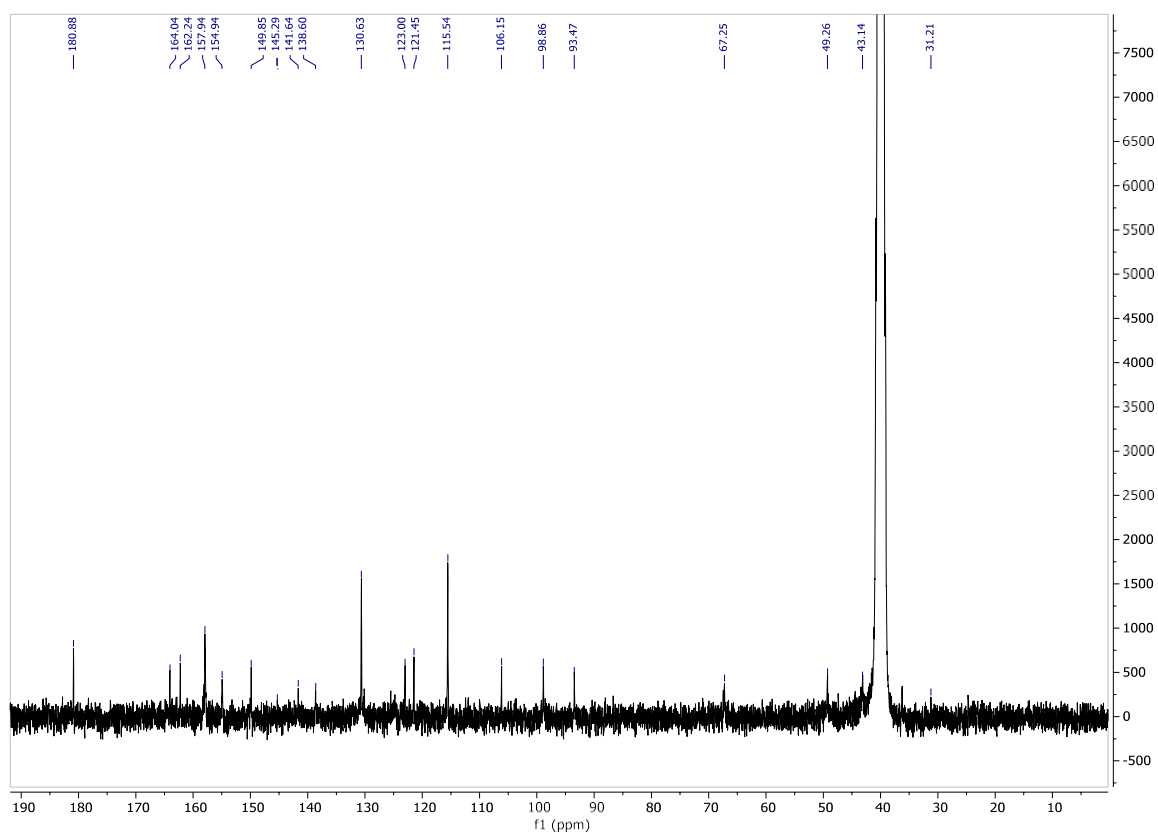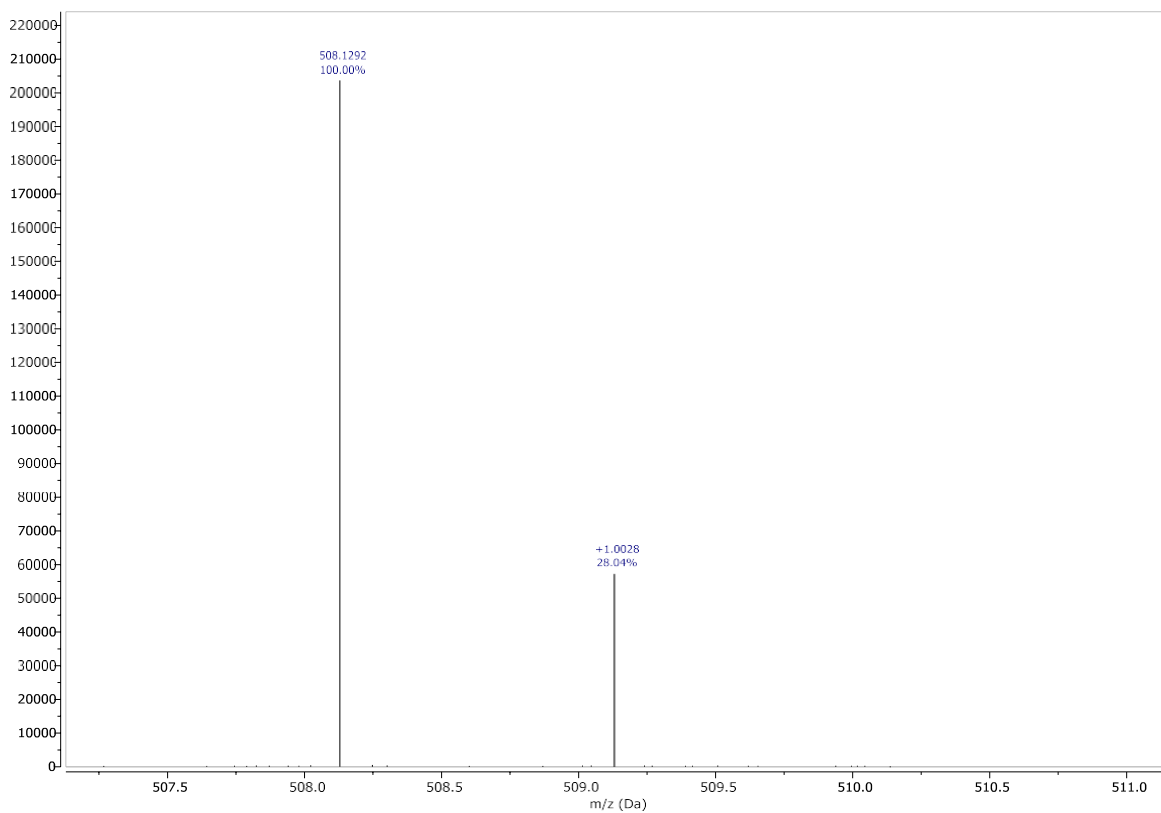

5-fluoro-1-((1-(3-((5-hydroxy-3-(4-hydroxyphenyl)-4-oxo-4H-chromen-7-yl)oxy)propyl)-1H-1,2,3-triazol-4-yl)methyl)pyrimidine-2,4(1H,3H)-dione (4b)

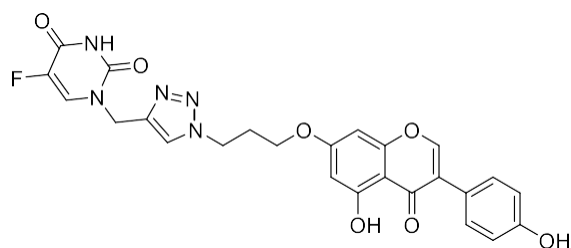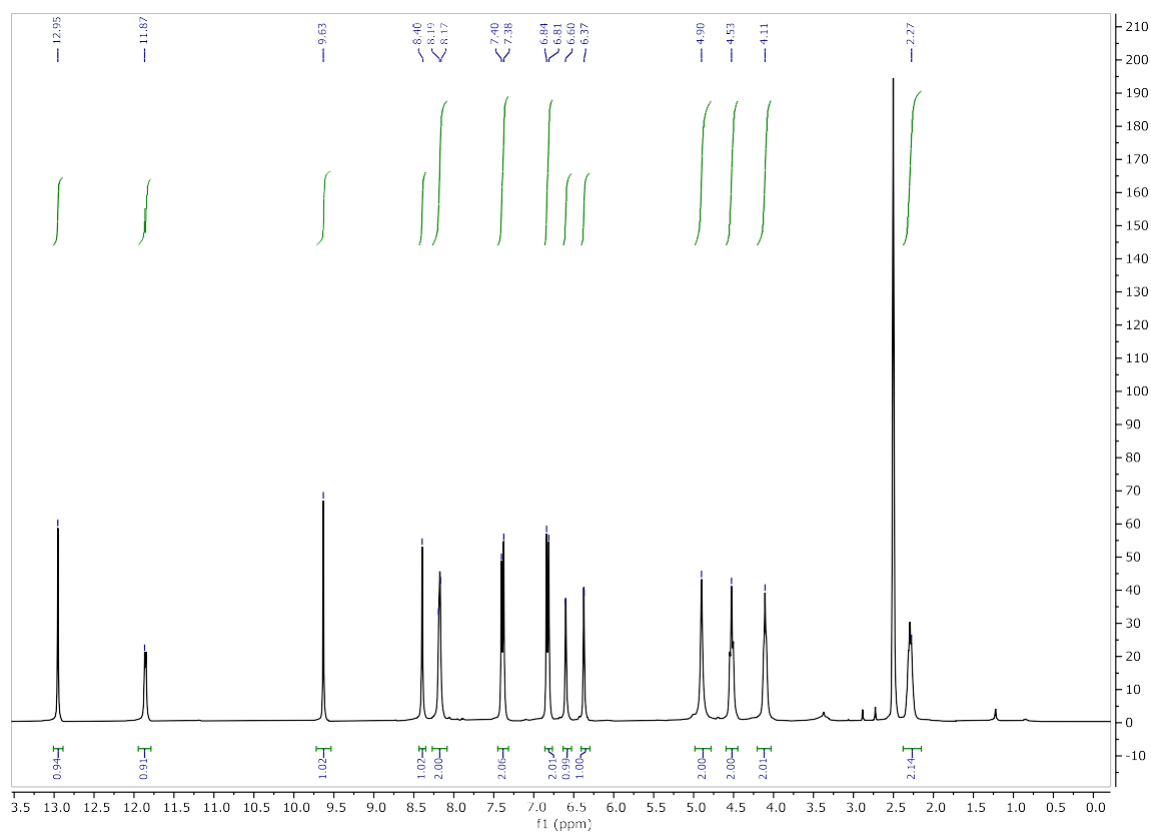

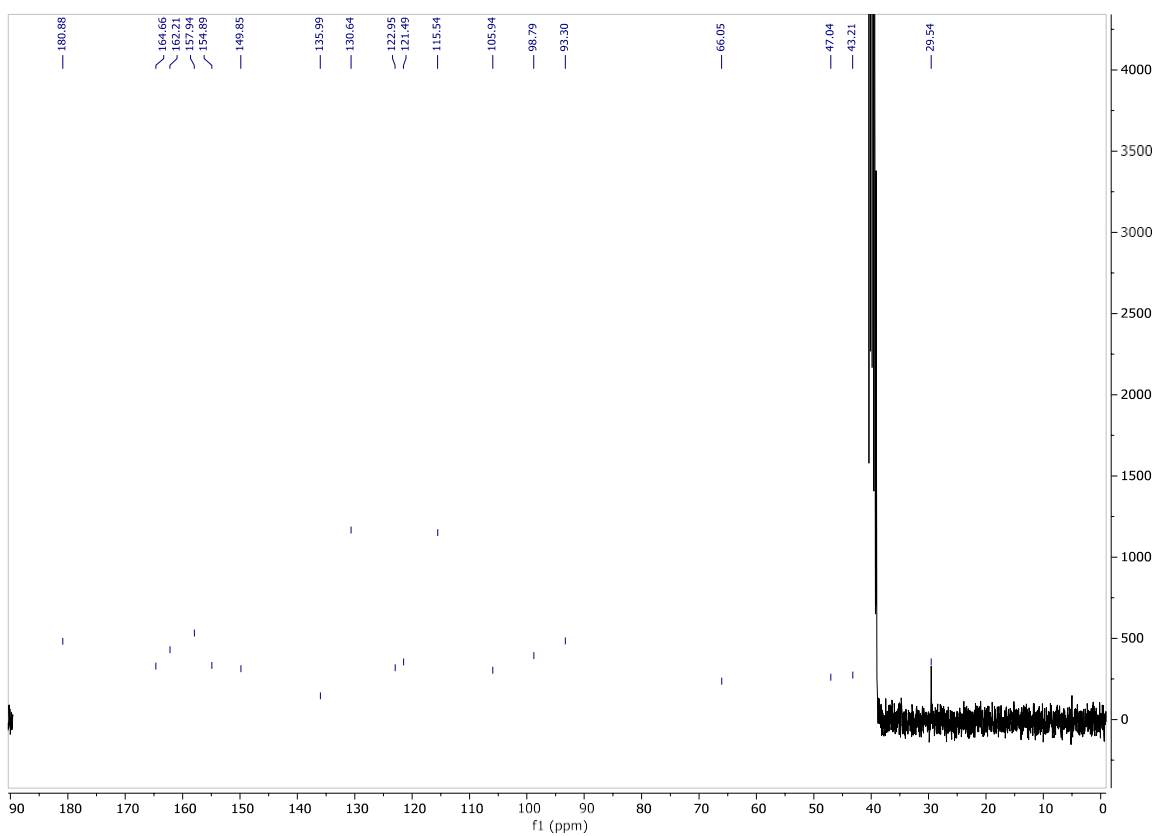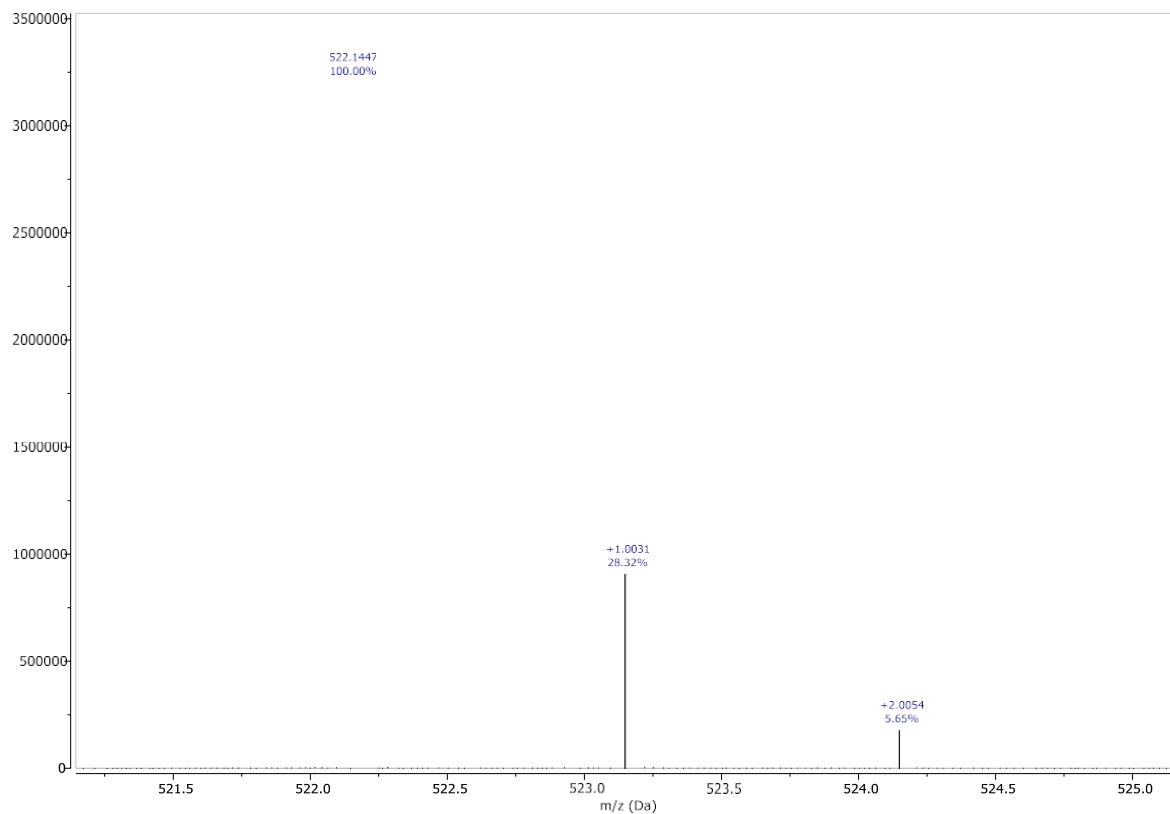

5-fluoro-1-((1-(3-((5-hydroxy-3-(4-hydroxyphenyl)-4-oxo-4H-chromen-7-yl)oxy)butyl)-1H-1,2,3-triazol-4-yl)methyl)pyrimidine-2,4(1H,3H)-dione (4c)

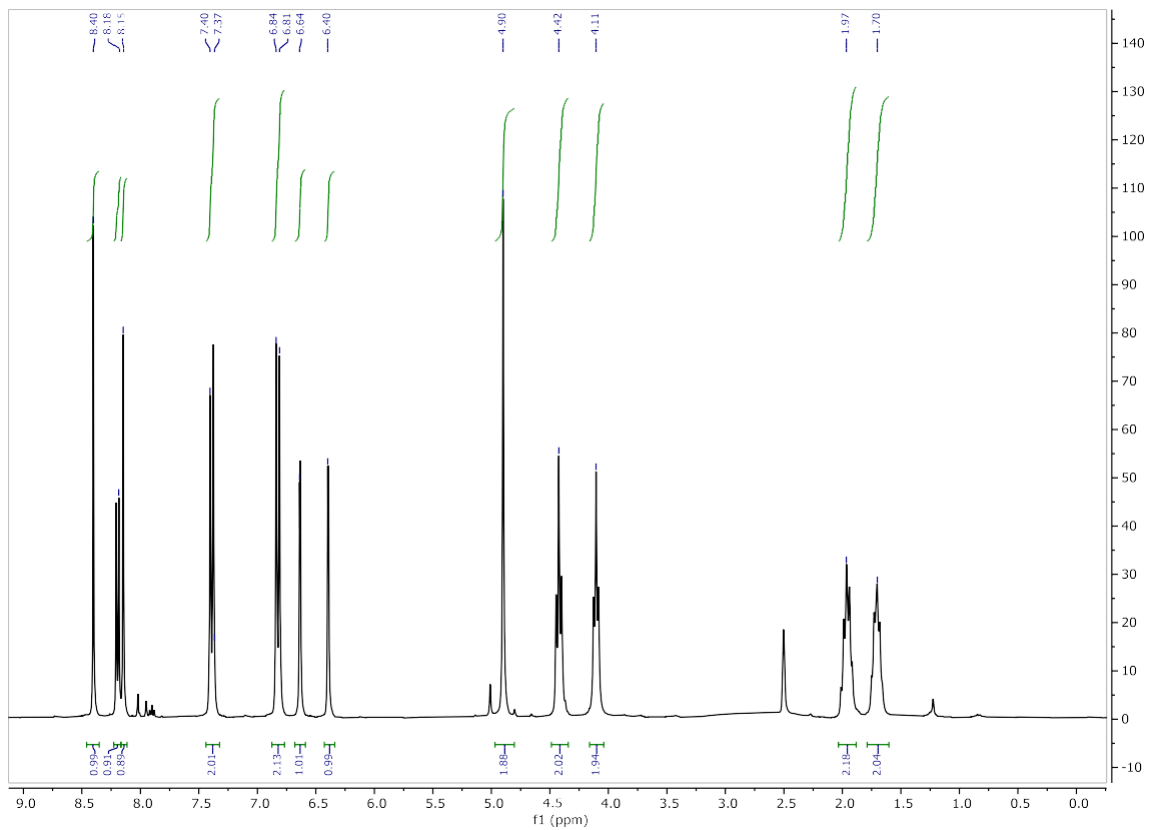

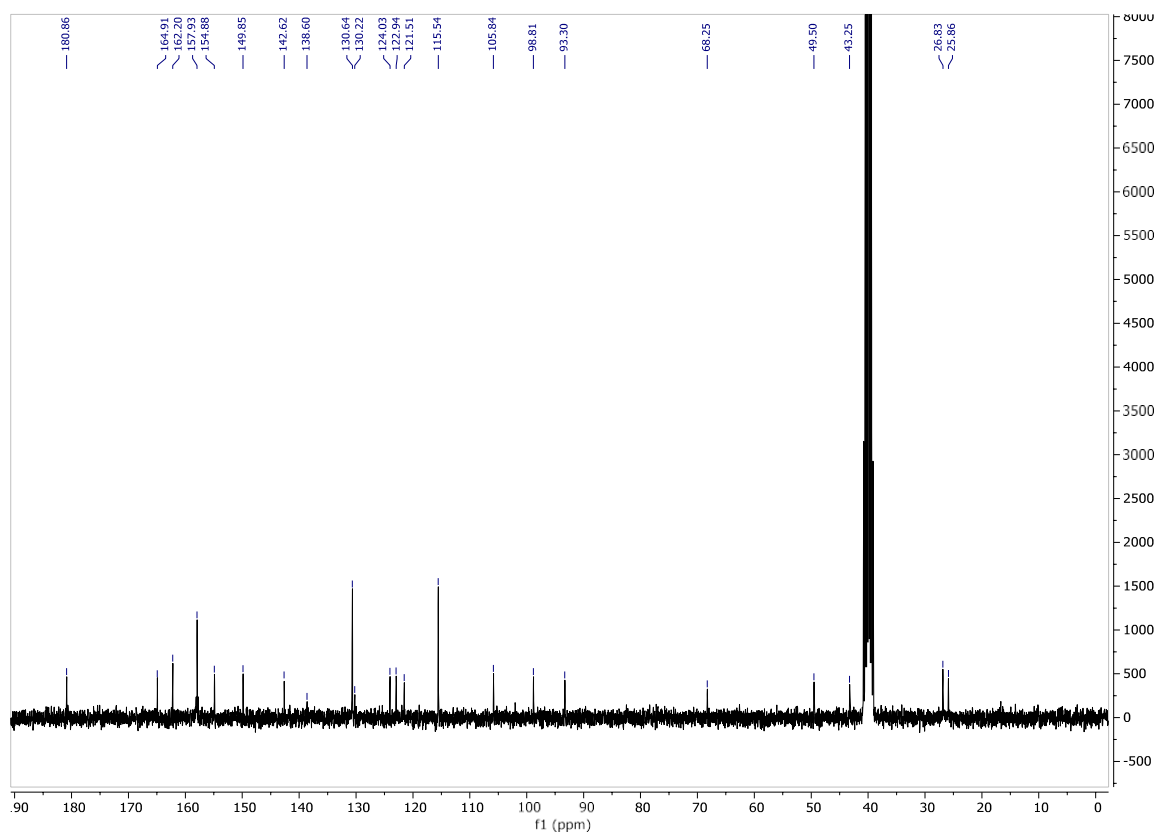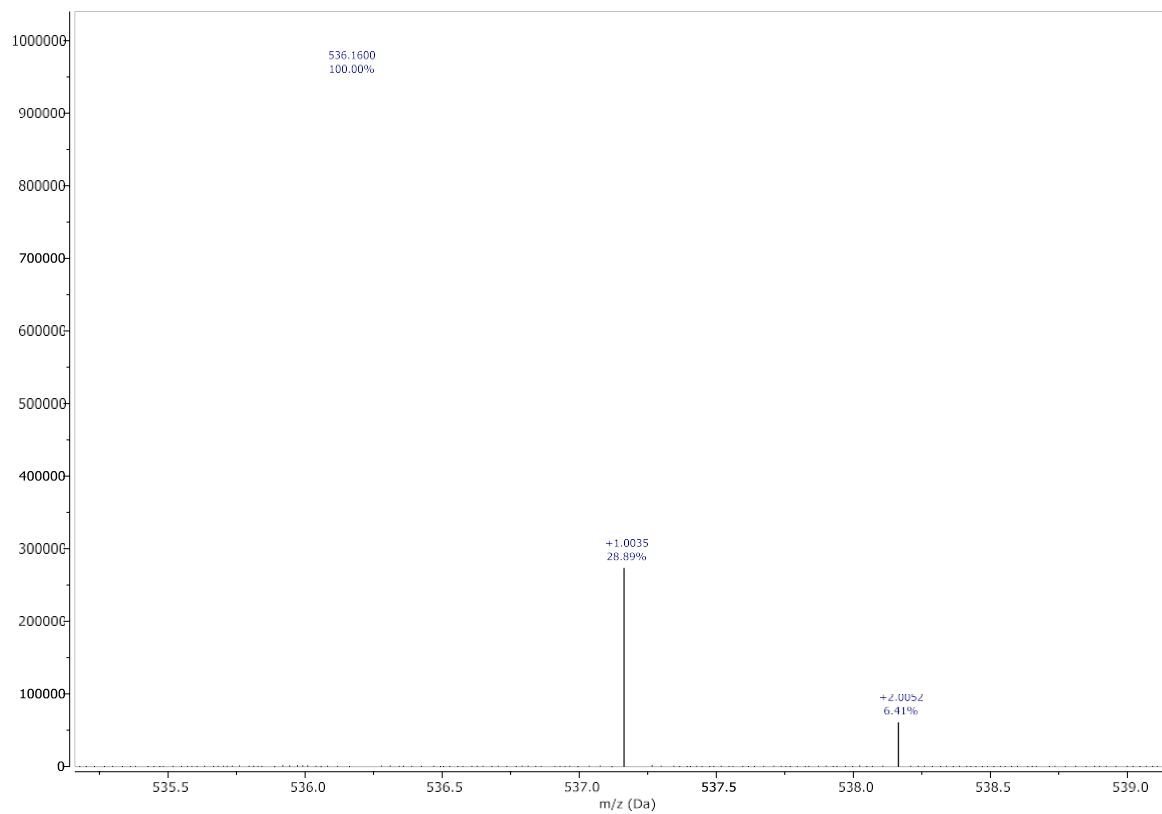

5-fluoro-1-((1-(3-((5-hydroxy-3-(4-hydroxyphenyl)-4-oxo-4H-chromen-7-yl)oxy)pentyl)-1H-1,2,3-triazol-4-yl)methyl)pyrimidine-2,4(1H,3H)-dione (4d)

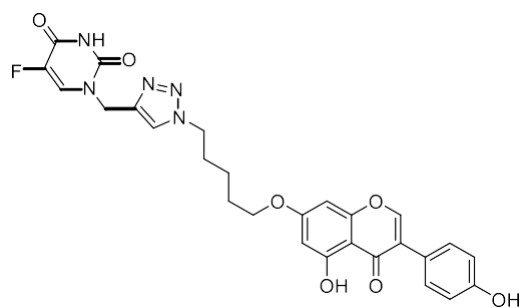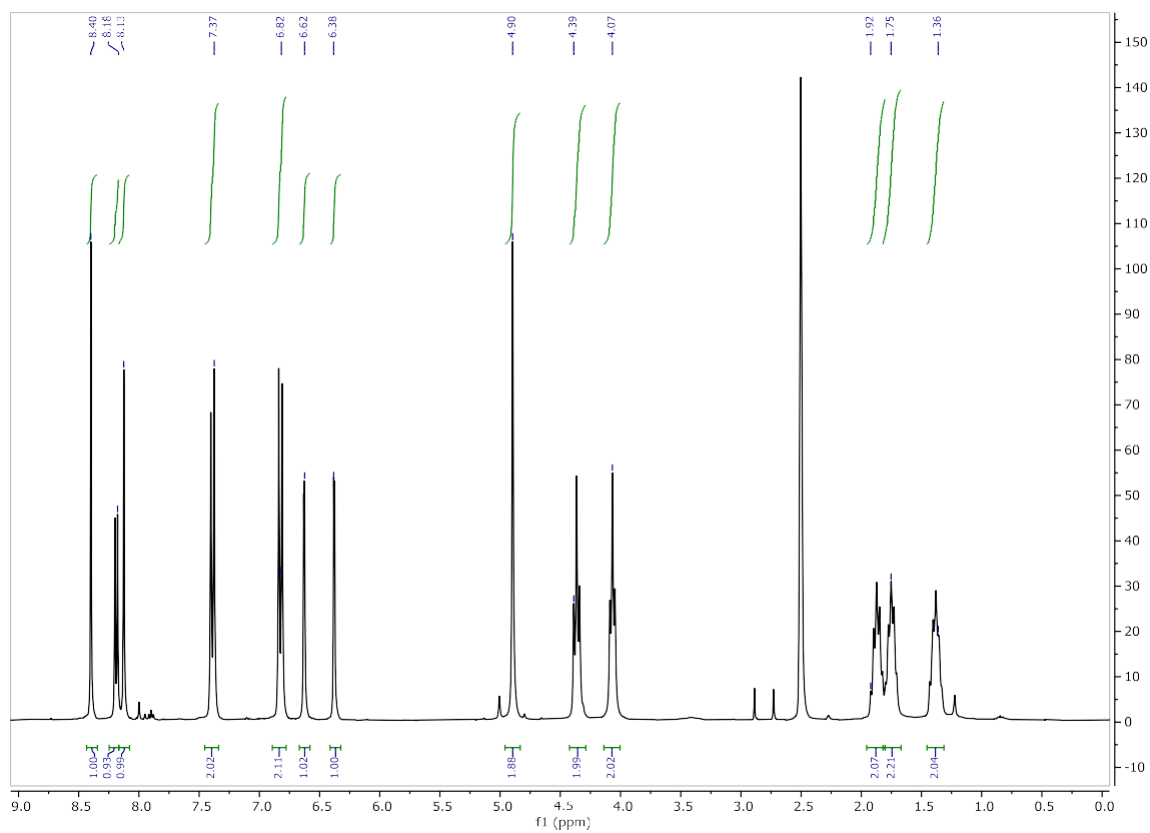



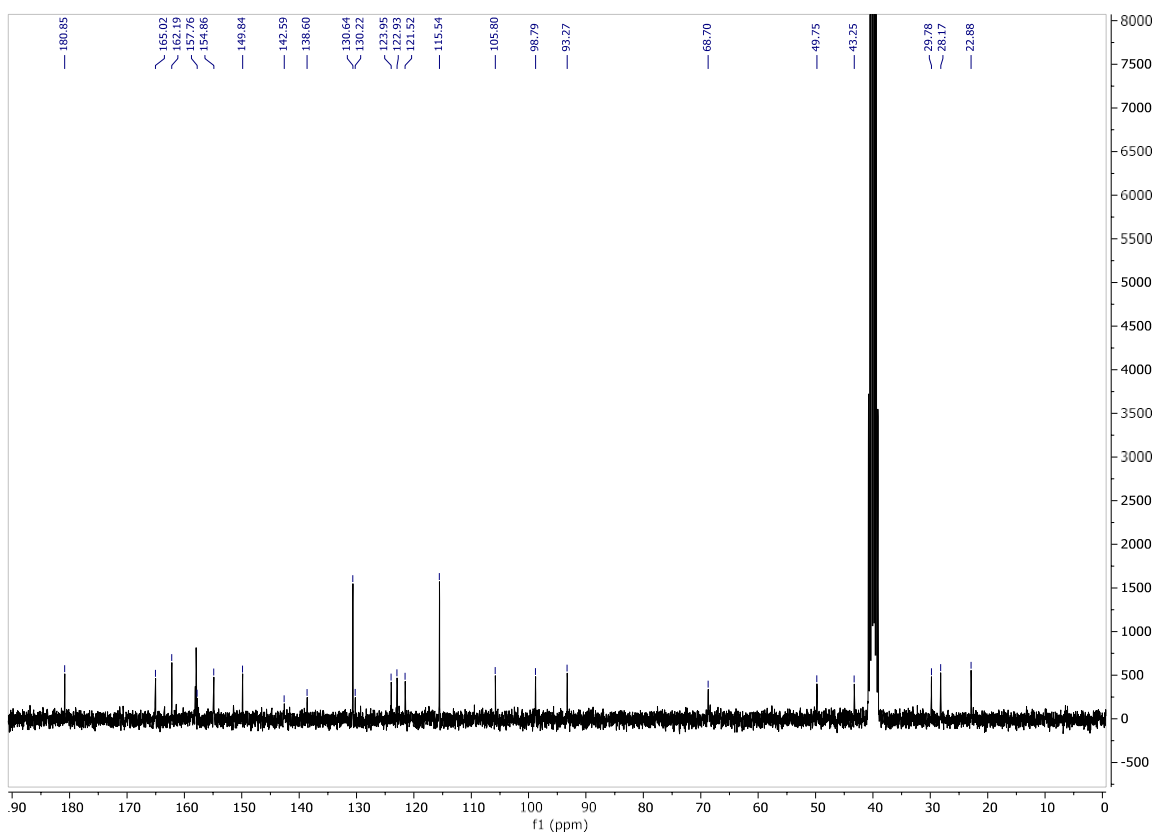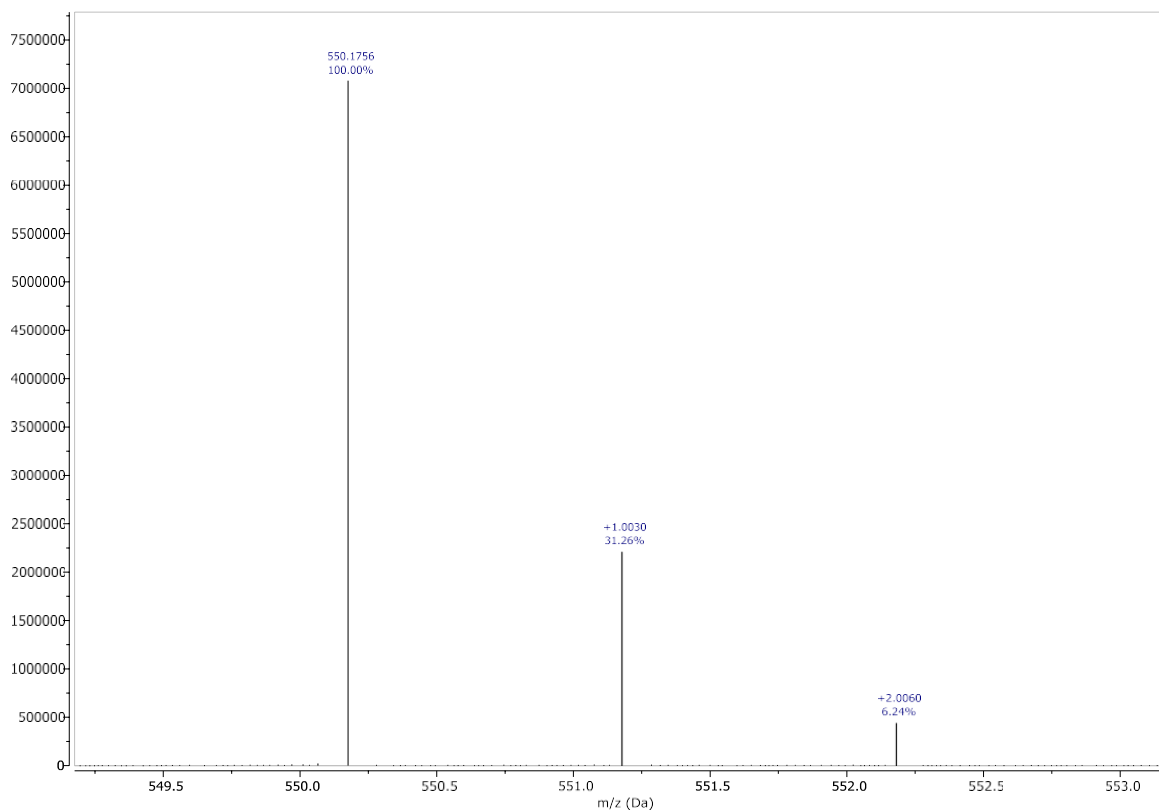

5-fluoro-1-((1-(3-((5-hydroxy-3-(4-hydroxyphenyl)-4-oxo-4H-chromen-7-yl)oxy)hexyl)-1H-1,2,3-triazol-4-yl)methyl)pyrimidine-2,4(1H,3H)-dione (4e)

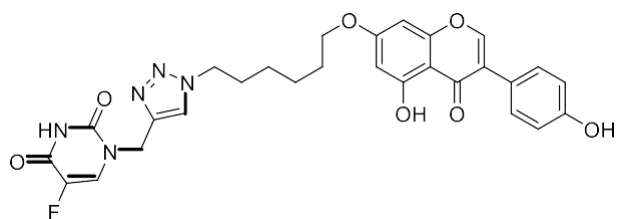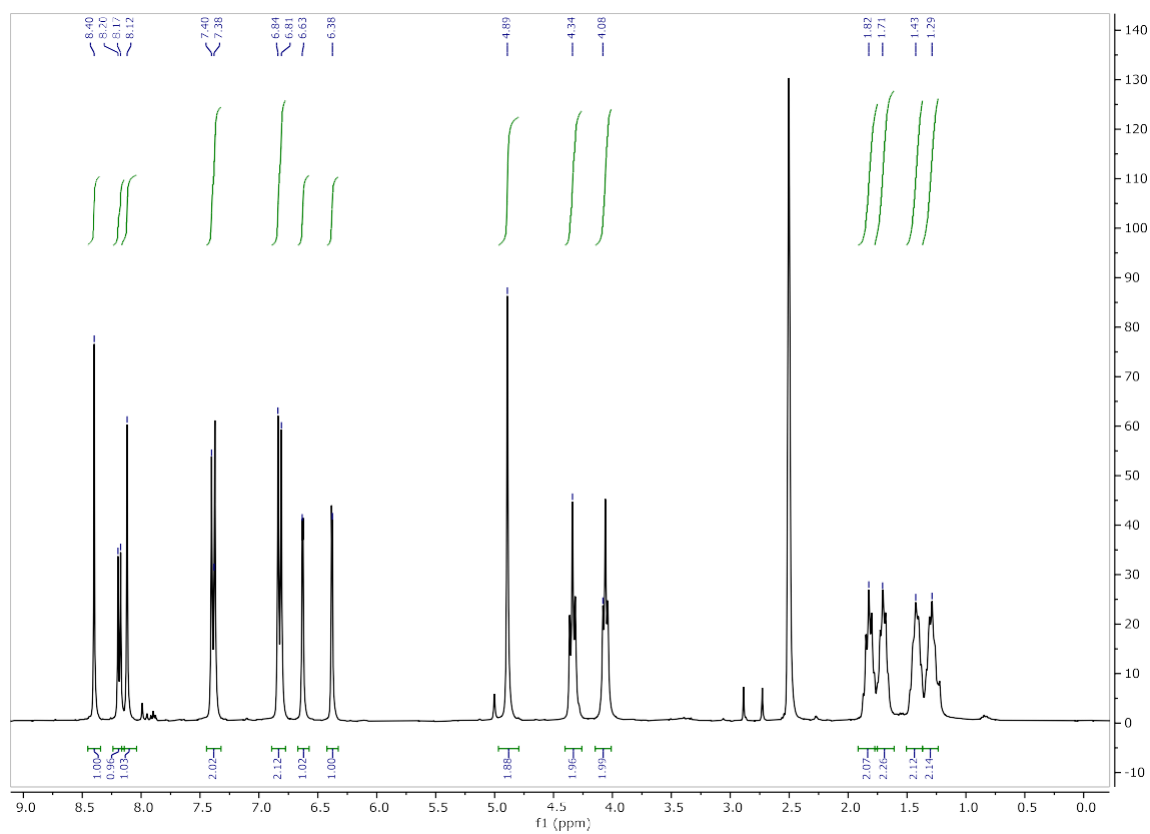

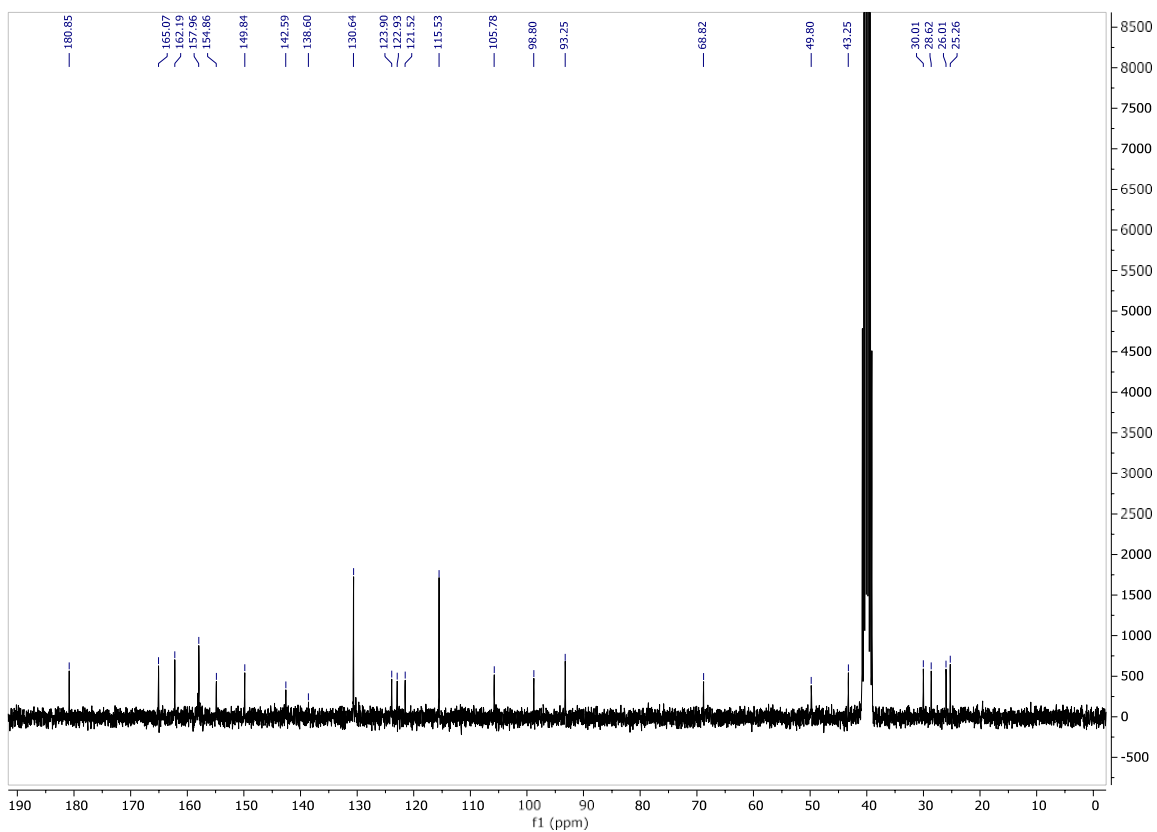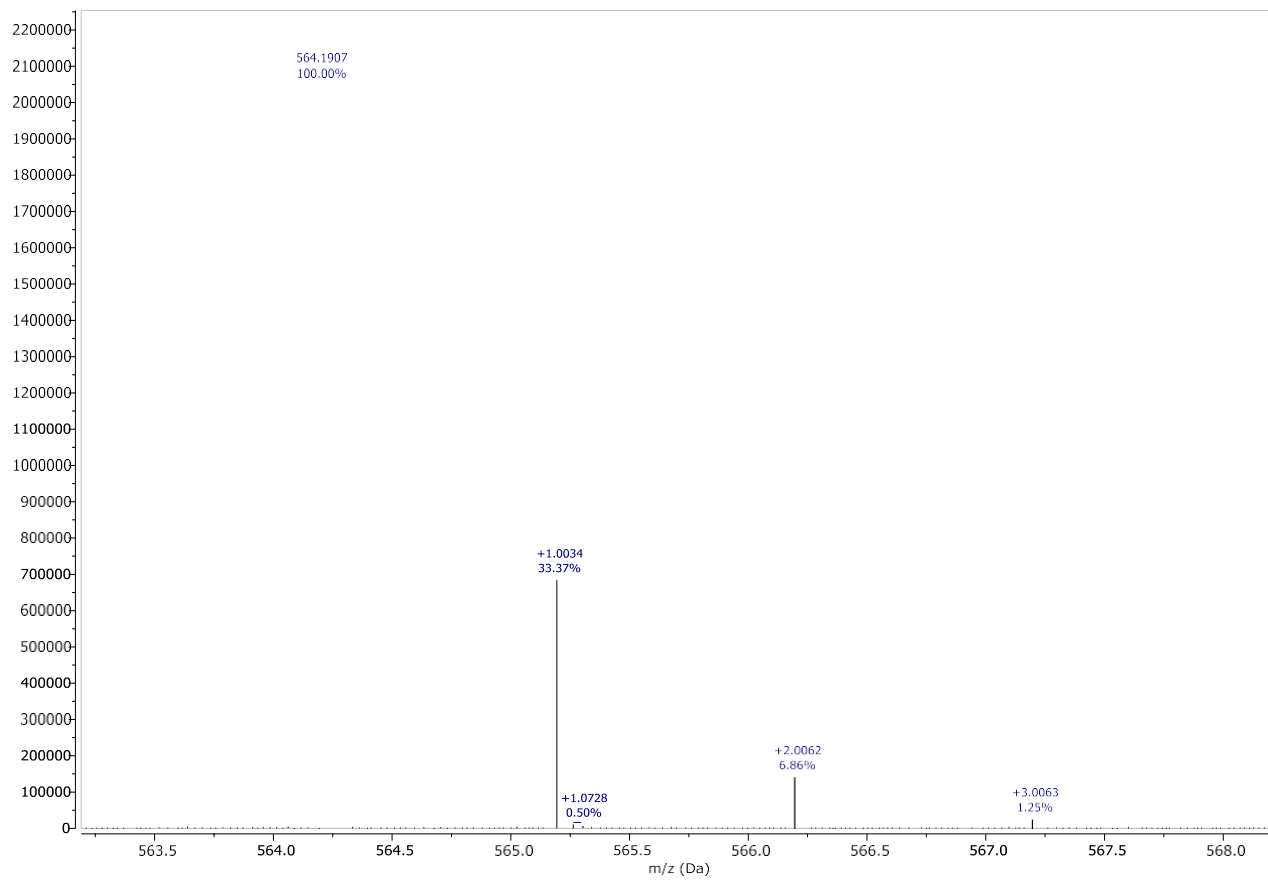

5-fluoro-1-((1-(3-((5-hydroxy-3-(4-hydroxyphenyl)-4-oxo-4H-chromen-7-yl)oxy)octyl)-1H-1,2,3-triazol-4-yl)methyl)pyrimidine-2,4(1H,3H)-dione (4f)

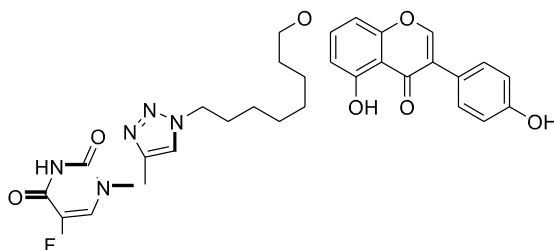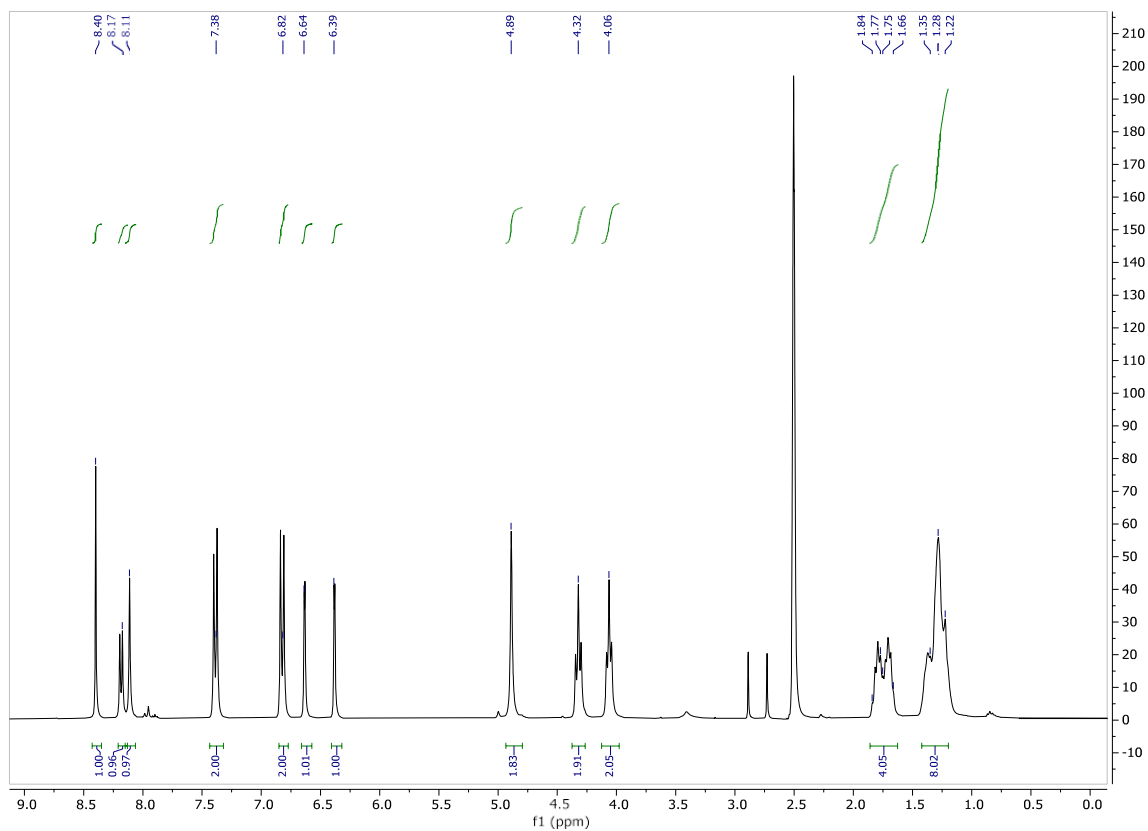

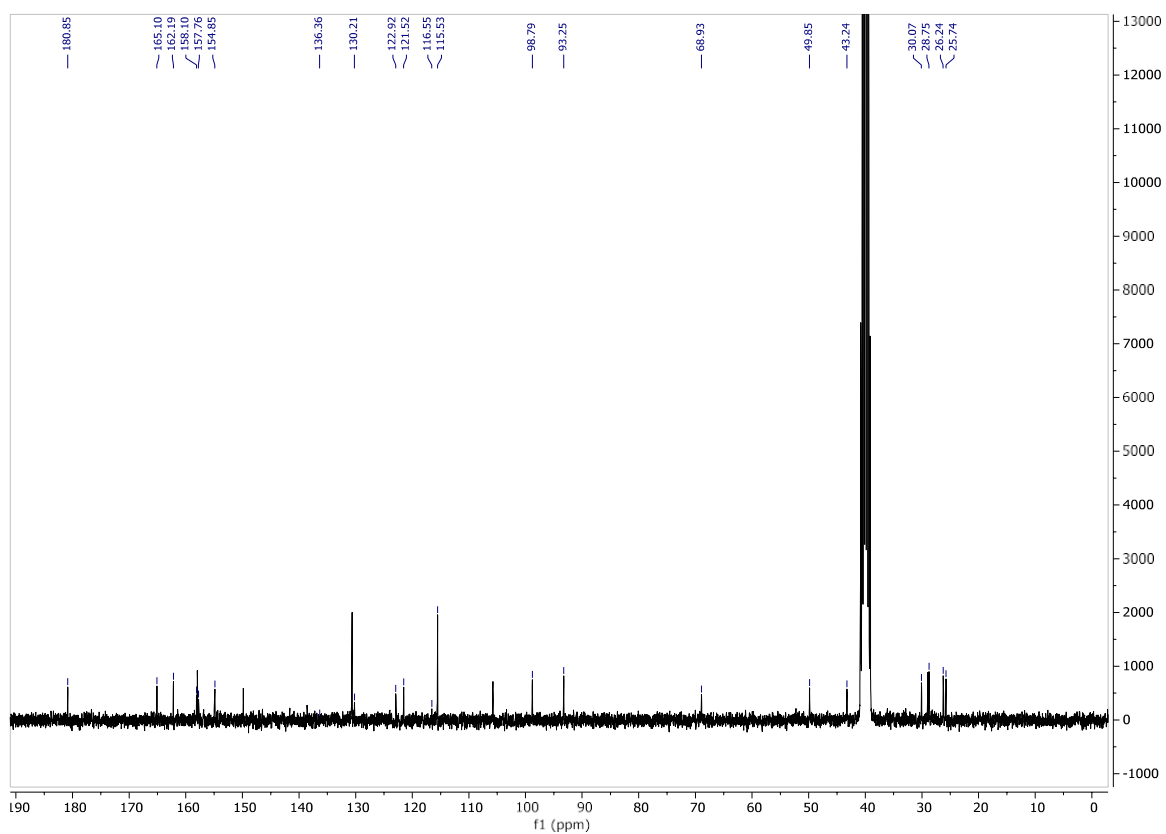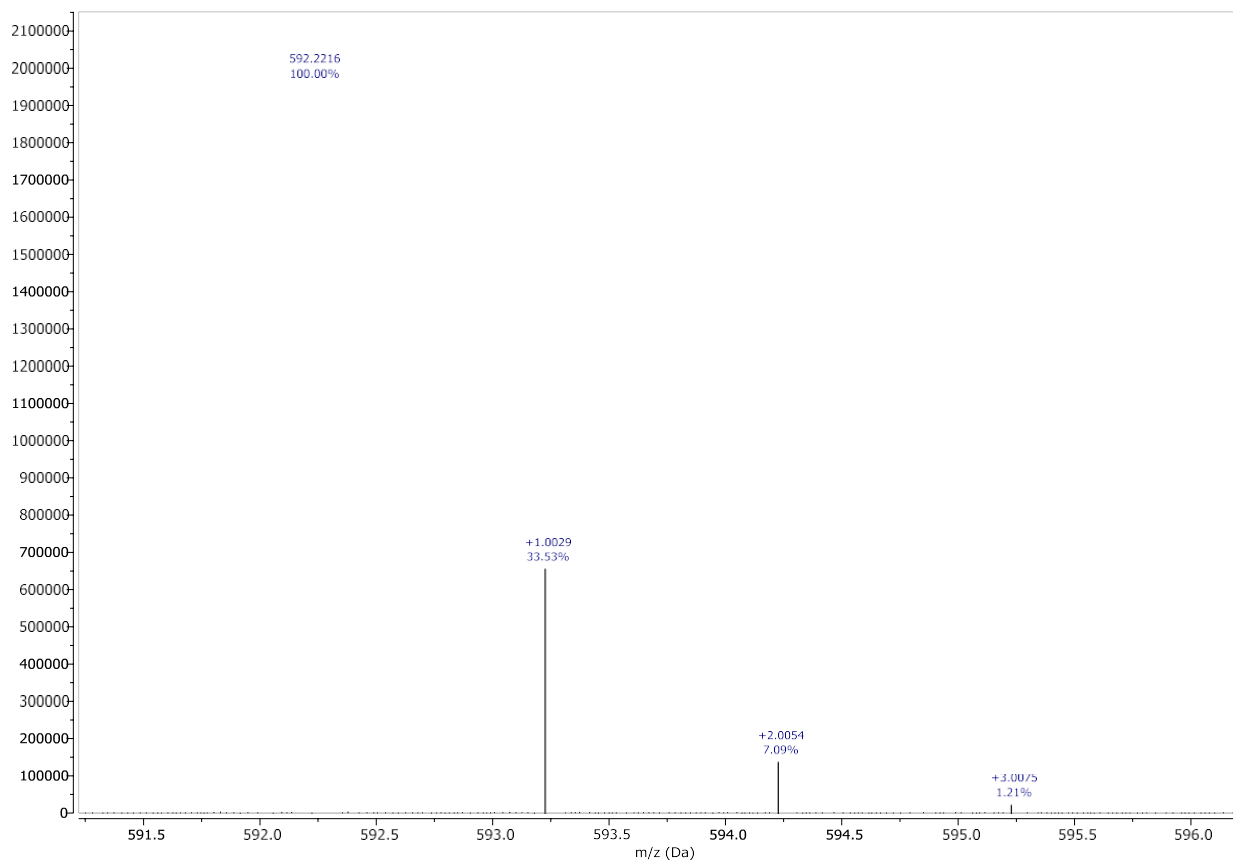

5-fluoro-1-((1-(3-((5-hydroxy-3-(4-hydroxyphenyl)-4-oxo-4H-chromen-7-yl)oxy)nonyl)-1H-1,2,3-triazol-4-yl)methyl)pyrimidine-2,4(1H,3H)-dione (4g)

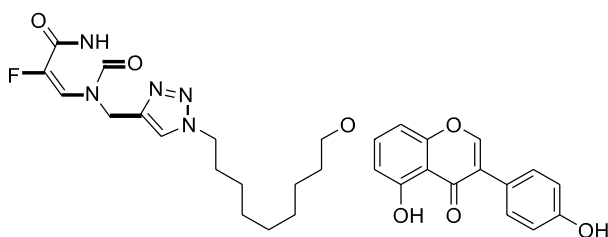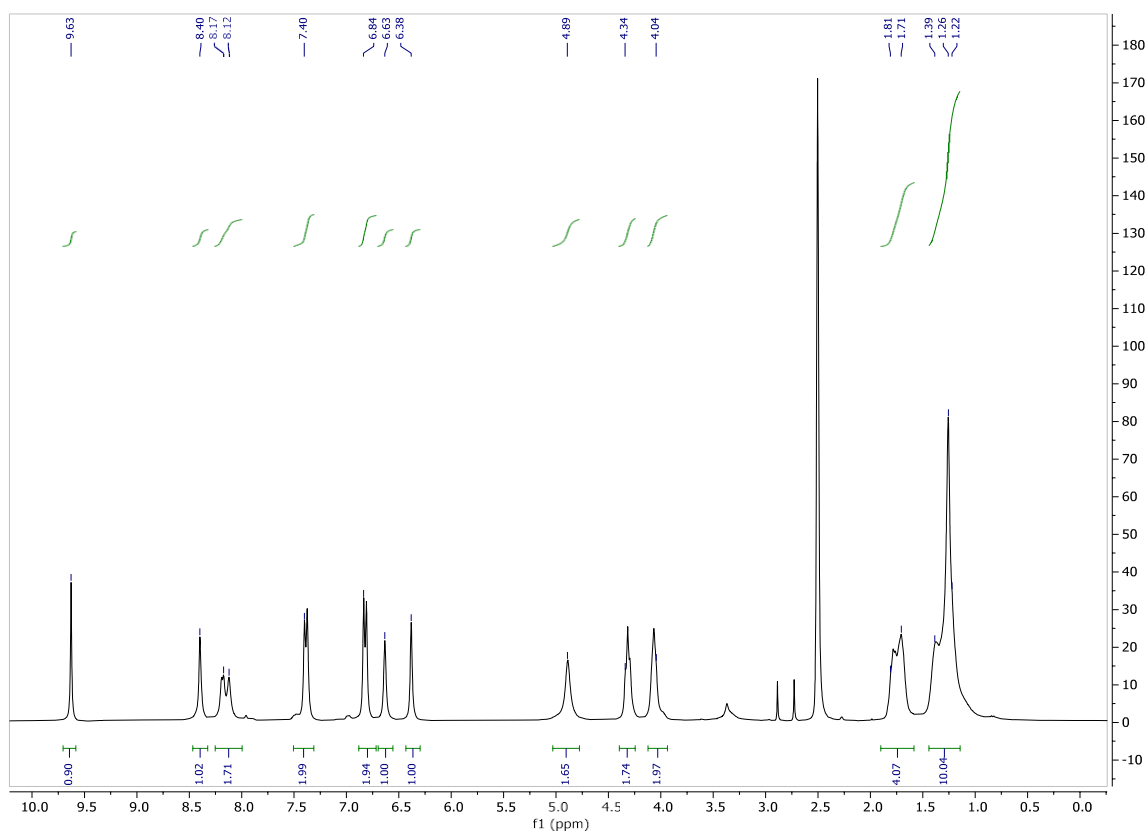

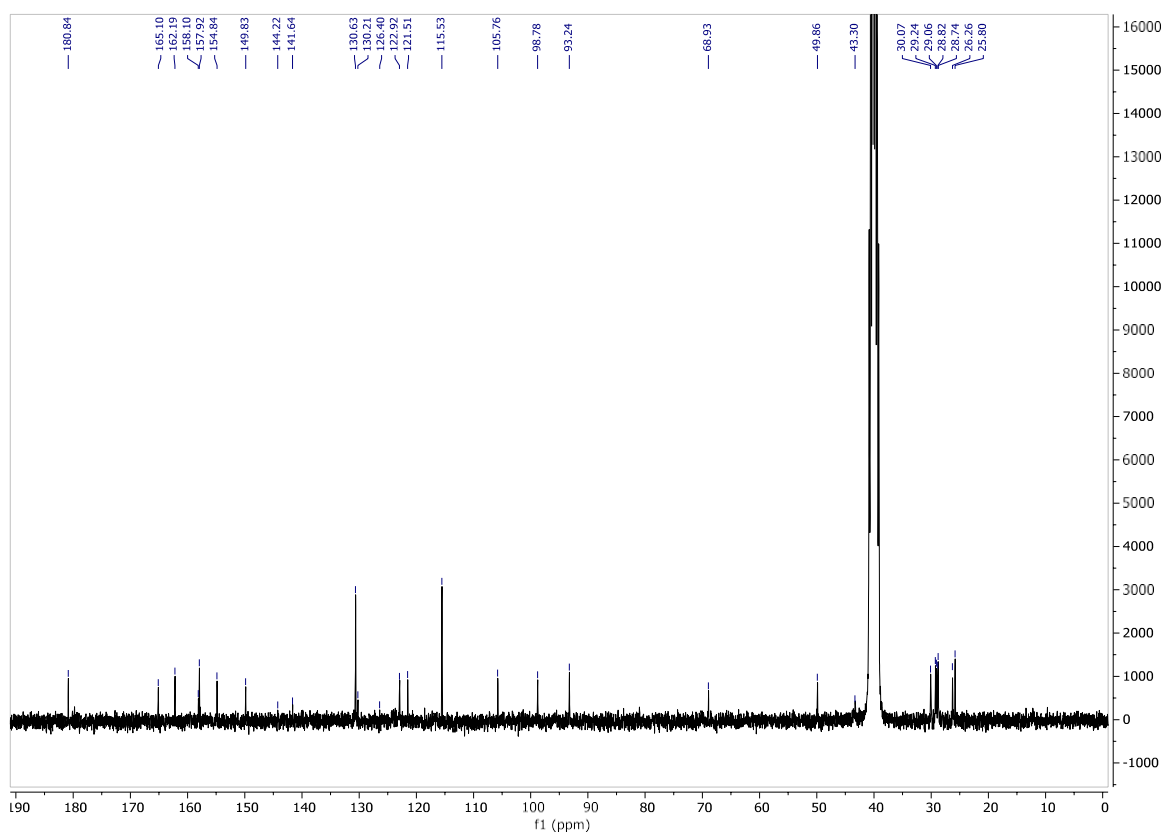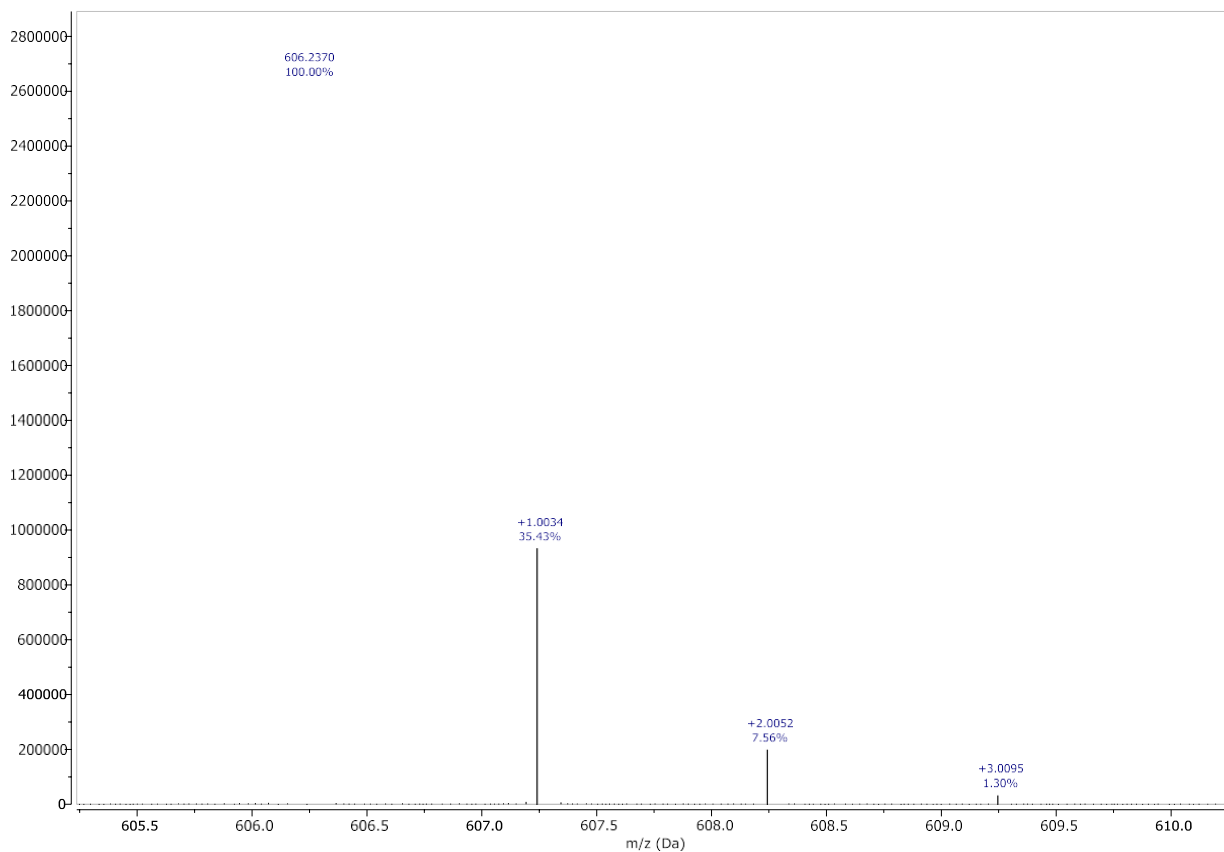

5-fluoro-1-((1-(3-((5-hydroxy-3-(4-hydroxyphenyl)-4-oxo-4H-chromen-7-yl)oxy)dodecyl)-1H-1,2,3-triazol-4-yl)methyl)pyrimidine-2,4(1H,3H)-dione (4h)

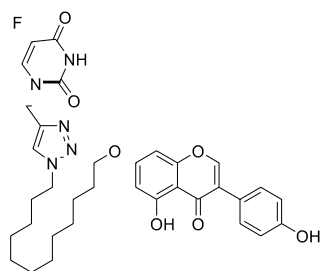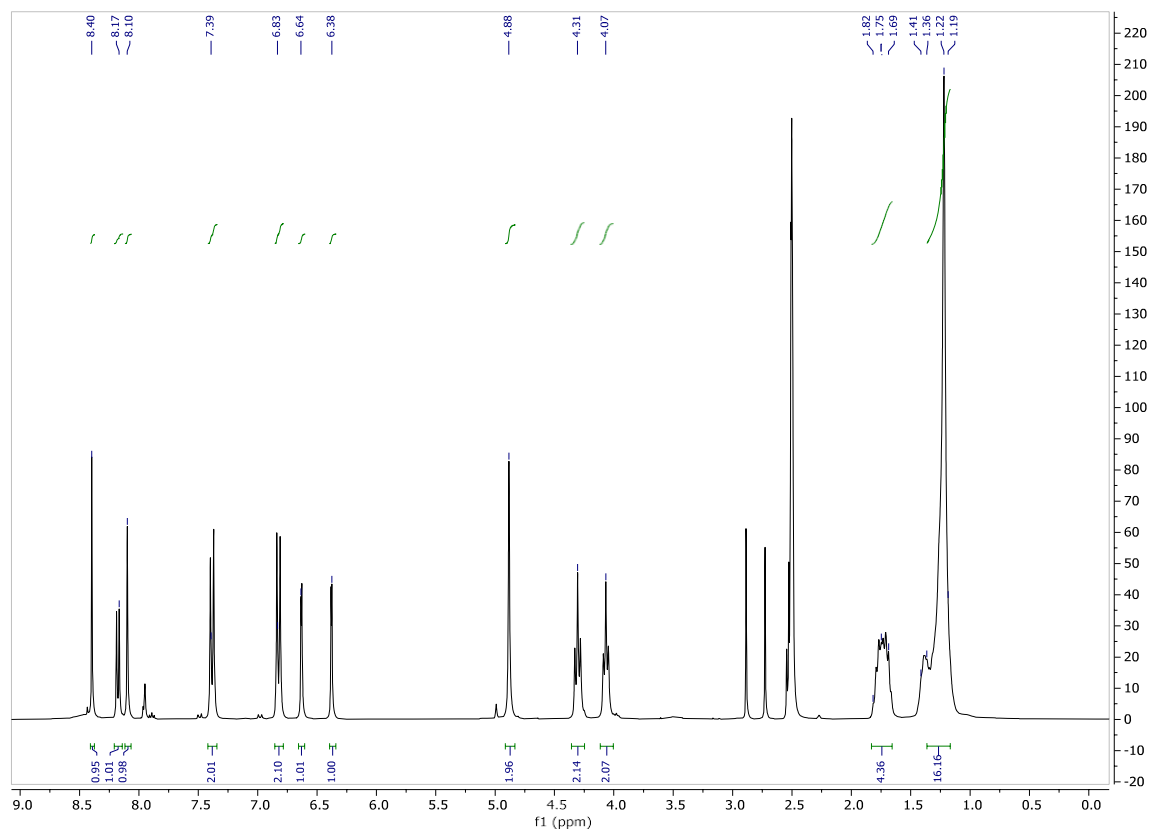



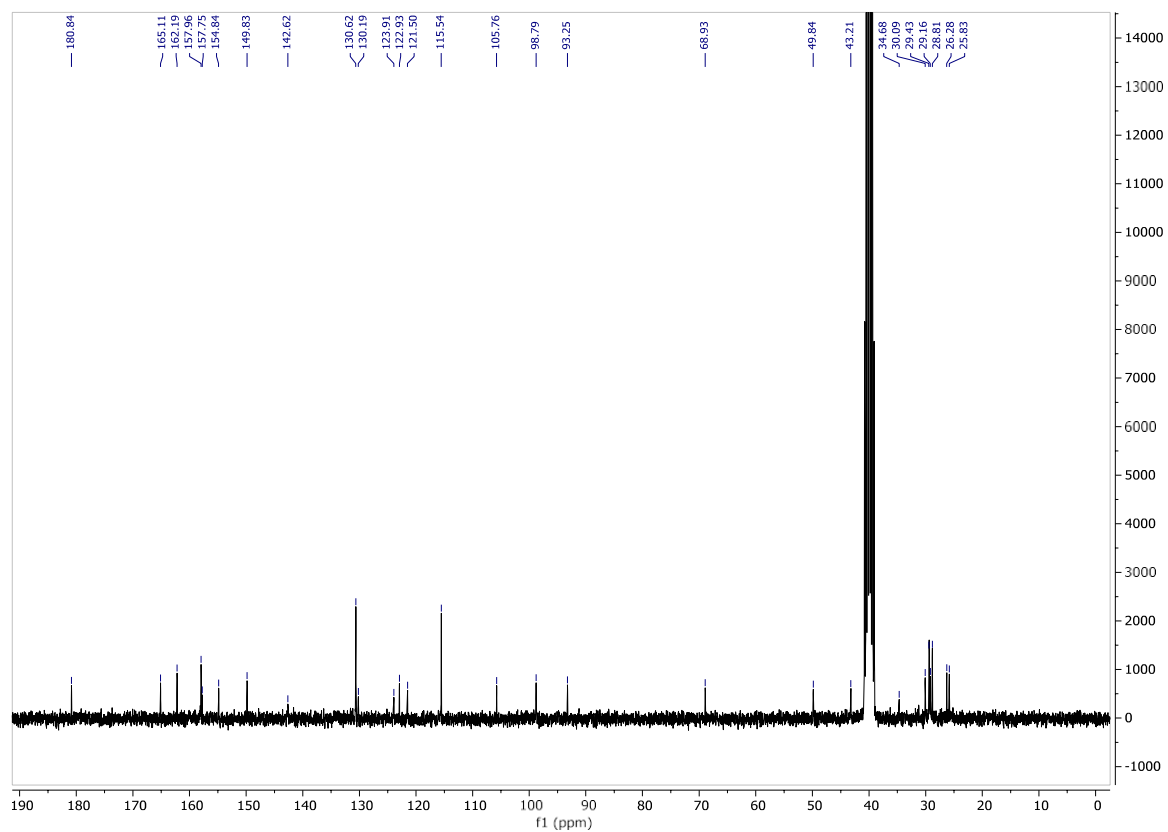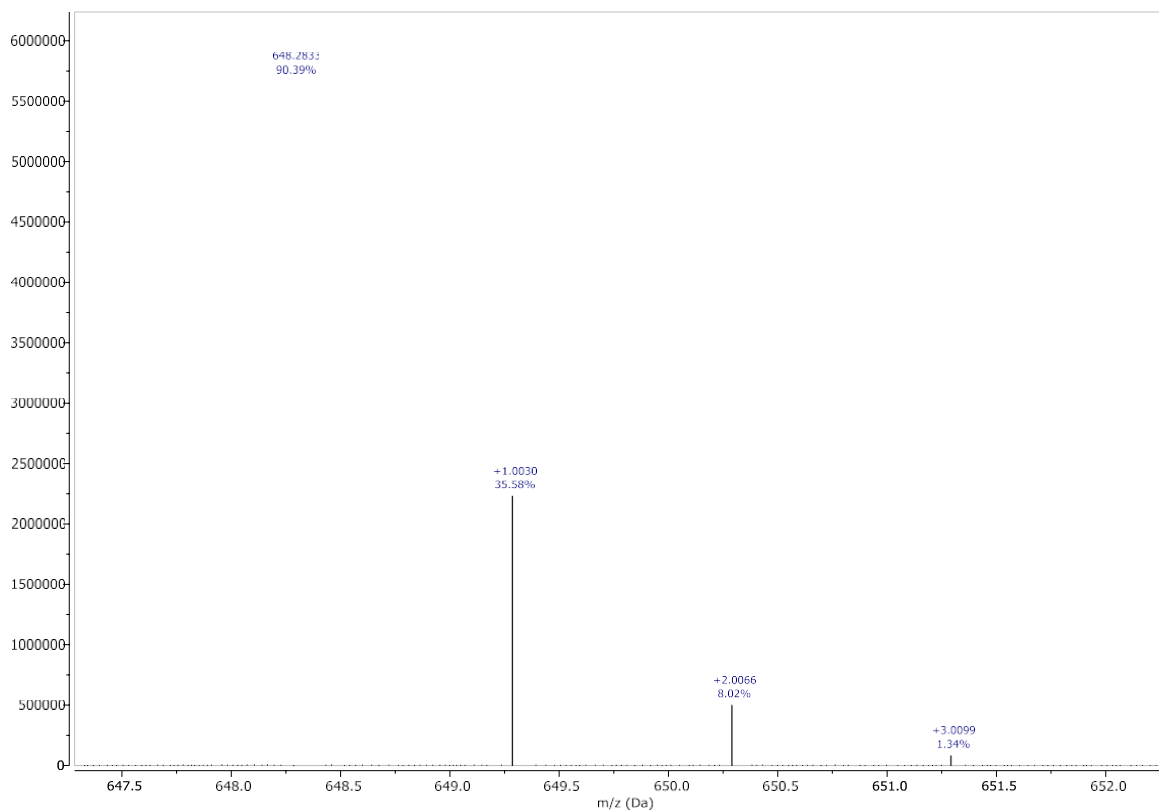

Figure S2. HPLC analysis

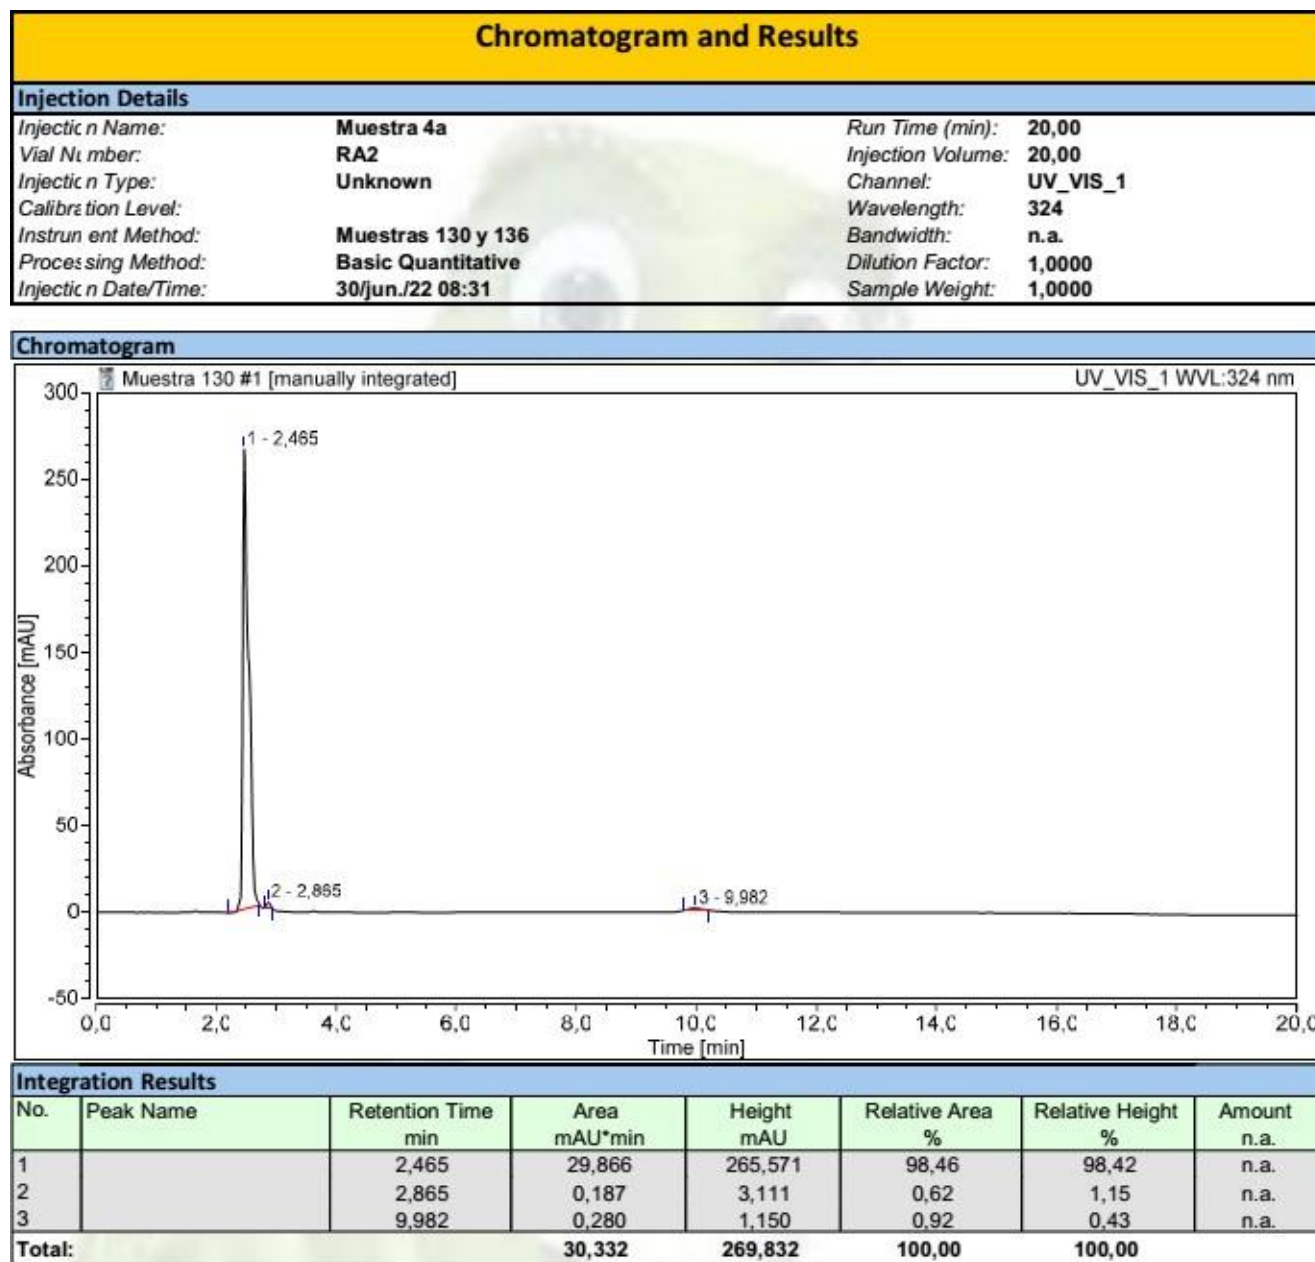

## Chromatogram and Results

### Injection Details

|                      |                           |                   |          |
|----------------------|---------------------------|-------------------|----------|
| Injection Name:      | 4b                        | Run Time (min):   | 12,00    |
| Vial Number:         | RE3                       | Injection Volume: | 20,00    |
| Injection Type:      | Unknown                   | Channel:          | UV_VIS_1 |
| Calibration Level:   |                           | Wavelength:       | 324      |
| Instrument Method:   | Muestras 130 y 136        | Bandwidth:        | n.a.     |
| Processing Method:   | Pureza muestras 130 y 136 | Dilution Factor:  | 1,0000   |
| Injection Date/Time: | 30/jun./22 8:49           | Sample Weight:    | 1,0000   |

### Chromatogram

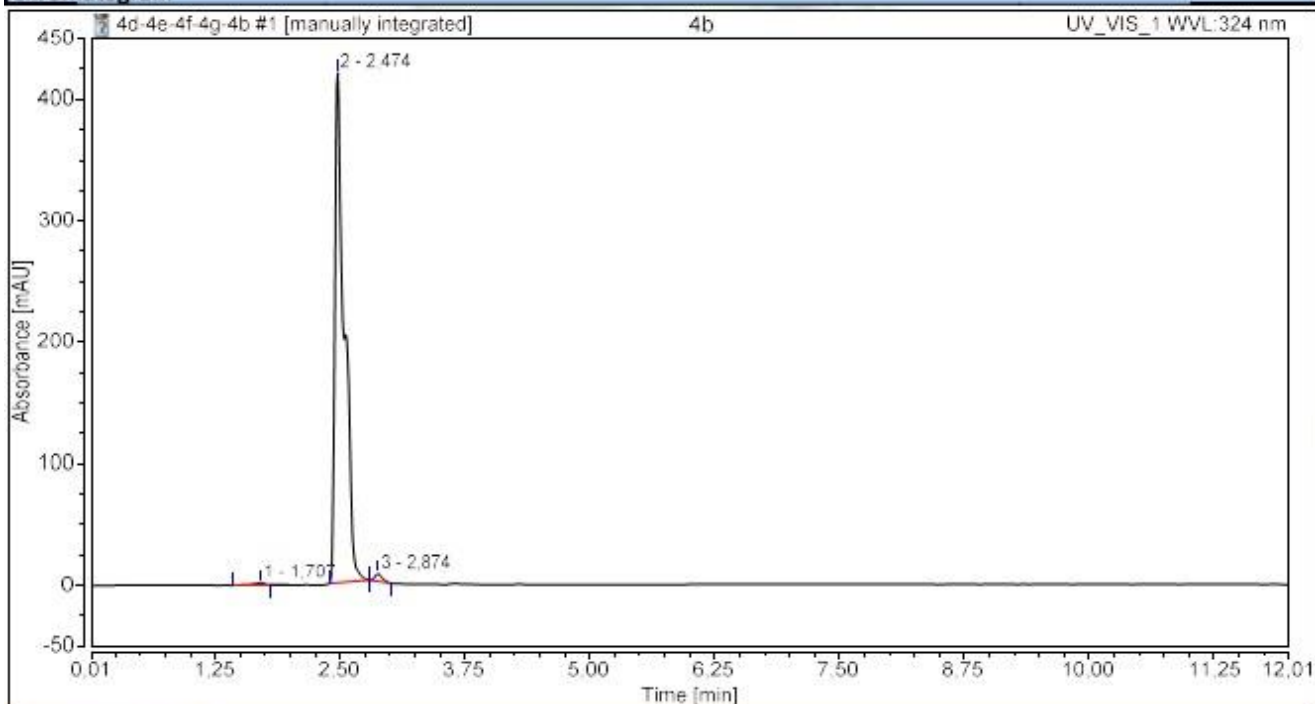

### Integration Results

| No.           | Peak Name | Retention Time<br>min | Area<br>mAU*min | Height<br>mAU  | Relative Area<br>% | Relative Height<br>% | Amount<br>n.a. |
|---------------|-----------|-----------------------|-----------------|----------------|--------------------|----------------------|----------------|
| 1             |           | 1,707                 | 0,306           | 2,368          | 0,65               | 0,55                 | n.a.           |
| 2             |           | 2,474                 | 45,910          | 420,057        | 98,19              | 97,96                | n.a.           |
| 3             |           | 2,874                 | 0,543           | 6,400          | 1,16               | 1,49                 | n.a.           |
| <b>Total:</b> |           |                       | <b>46,758</b>   | <b>428,825</b> | <b>100,00</b>      | <b>100,00</b>        |                |

## Chromatogram and Results

### Injection Details

|                      |                           |                   |          |
|----------------------|---------------------------|-------------------|----------|
| Injection Name:      | 4c                        | Run Time (min):   | 12,00    |
| Vial Number:         | RB2                       | Injection Volume: | 20,00    |
| Injection Type:      | Unknown                   | Channel:          | UV_VIS_1 |
| Calibration Level:   |                           | Wavelength:       | 324      |
| Instrument Method:   | Muestras 130 y 136        | Bandwidth:        | n.a.     |
| Processing Method:   | Pureza muestras 130 y 136 | Dilution Factor:  | 1,0000   |
| Injection Date/Time: | 30/jun./22 09:16          | Sample Weight:    | 1,0000   |

### Chromatogram

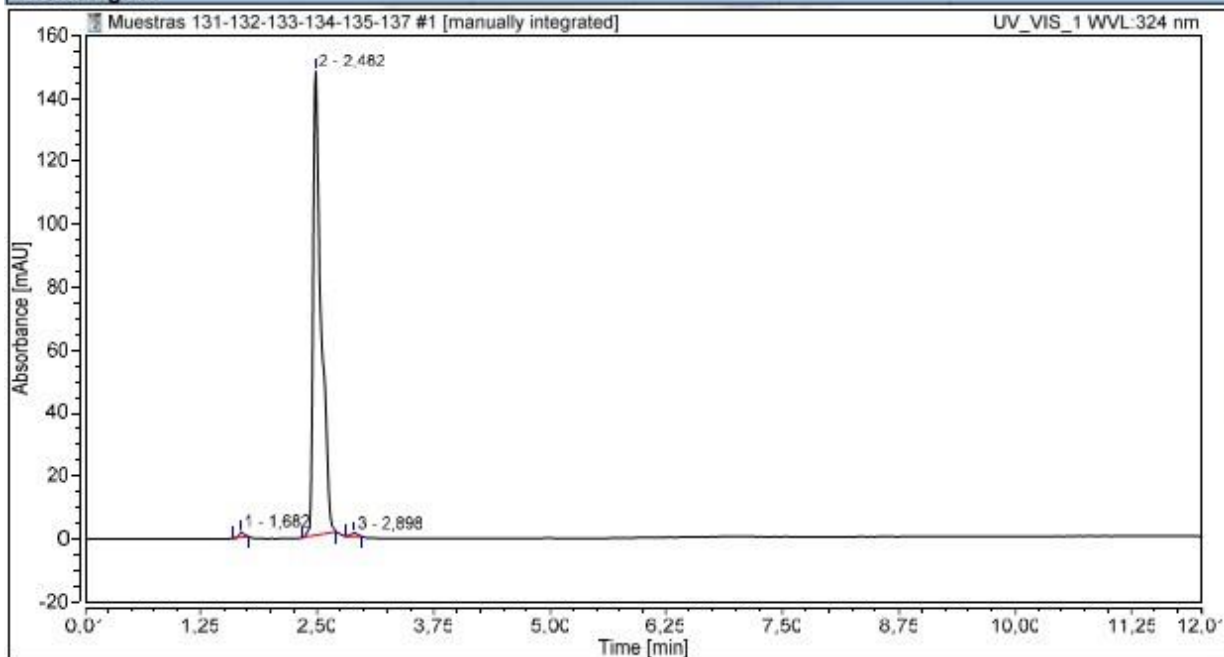

### Integration Results

| No.           | Peak Name | Retention Time<br>min | Area<br>mAU*min | Height<br>mAU  | Relative Area<br>% | Relative Height<br>% | Amount<br>n.a. |
|---------------|-----------|-----------------------|-----------------|----------------|--------------------|----------------------|----------------|
| 1             |           | 1,682                 | 0,096           | 1,756          | 0,65               | 1,17                 | n.a.           |
| 2             |           | 2,482                 | 14,533          | 147,499        | 98,77              | 98,15                | n.a.           |
| 3             |           | 2,898                 | 0,084           | 1,031          | 0,57               | 0,69                 | n.a.           |
| <b>Total:</b> |           |                       | <b>14,714</b>   | <b>150,285</b> | <b>100,00</b>      | <b>100,00</b>        |                |

## Chromatogram and Results

### Injection Details

|                      |                                       |                   |          |
|----------------------|---------------------------------------|-------------------|----------|
| Injection Name:      | 4d                                    | Run Time (min):   | 10,00    |
| Vial Number:         | RC1                                   | Injection Volume: | 40,00    |
| Injection Type:      | Unknown                               | Channel:          | UV_VIS_1 |
| Calibration Level:   |                                       | Wavelength:       | 324      |
| Instrument Method:   | Serie 4a-4h_Isocratico_MeOH-ACN_80-20 | Bandwidth:        | n.a.     |
| Processing Method:   | Pureza muestras 130 y 136             | Dilution Factor:  | 1,0000   |
| Injection Date/Time: | 06/oct./22 10:01                      | Sample Weight:    | 1,0000   |

### Chromatogram

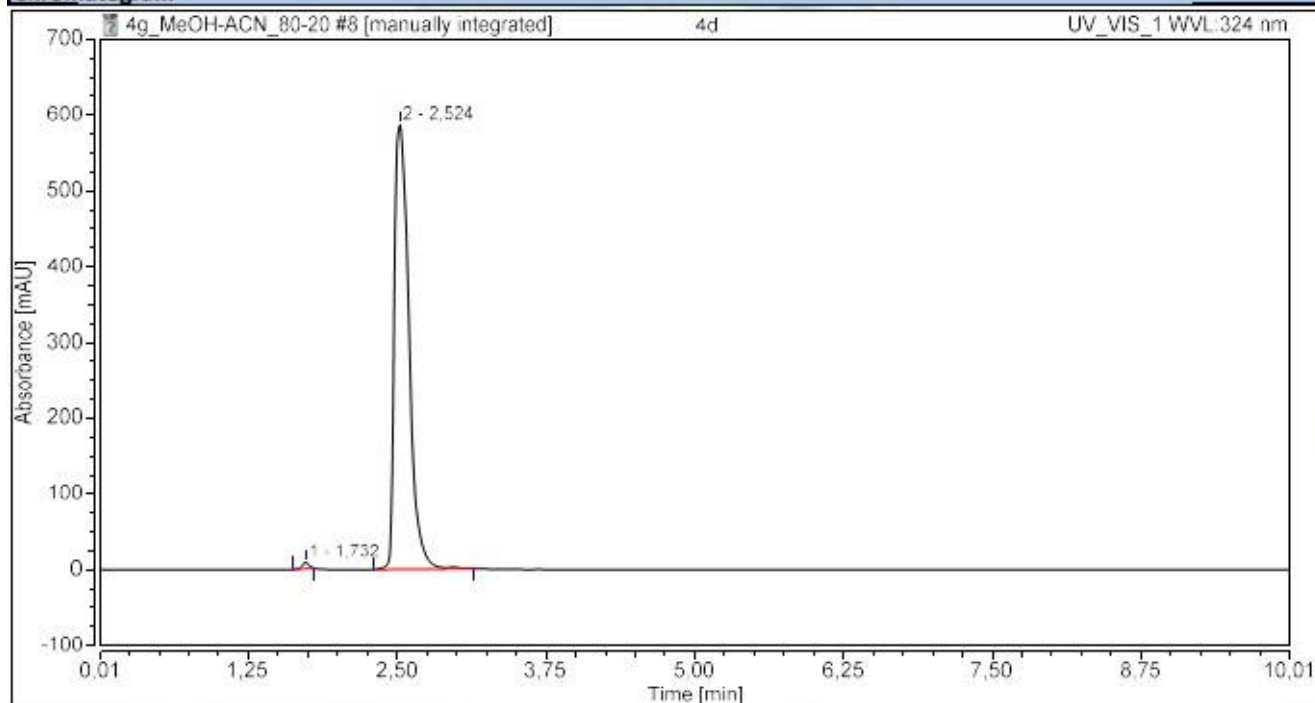

### Integration Results

| No.           | Peak Name | Retention Time<br>min | Area<br>mAU*min | Height<br>mAU  | Relative Area<br>% | Relative Height<br>% | Amount<br>n.a. |
|---------------|-----------|-----------------------|-----------------|----------------|--------------------|----------------------|----------------|
| 1             |           | 1,732                 | 0,549           | 8,595          | 0,65               | 1,44                 | n.a.           |
| 2             |           | 2,524                 | 83,316          | 586,753        | 99,35              | 98,56                | n.a.           |
| <b>Total:</b> |           |                       | <b>83,865</b>   | <b>595,347</b> | <b>100,00</b>      | <b>100,00</b>        |                |

## Chromatogram and Results

### Injection Details

|                      |                                       |                   |          |
|----------------------|---------------------------------------|-------------------|----------|
| Injection Name:      | 4e                                    | Run Time (min):   | 10,00    |
| Vial Number:         | RC2                                   | Injection Volume: | 40,00    |
| Injection Type:      | Unknown                               | Channel:          | UV_VIS_3 |
| Calibration Level:   |                                       | Wavelength:       | 336      |
| Instrument Method:   | Serie 4a-4h_Isocratico_MeOH-ACN_80-20 | Bandwidth:        | n.a.     |
| Processing Method:   | Pureza muestras 130 y 136             | Dilution Factor:  | 1,0000   |
| Injection Date/Time: | 06/oct/22 12:46                       | Sample Weight:    | 1,0000   |

### Chromatogram

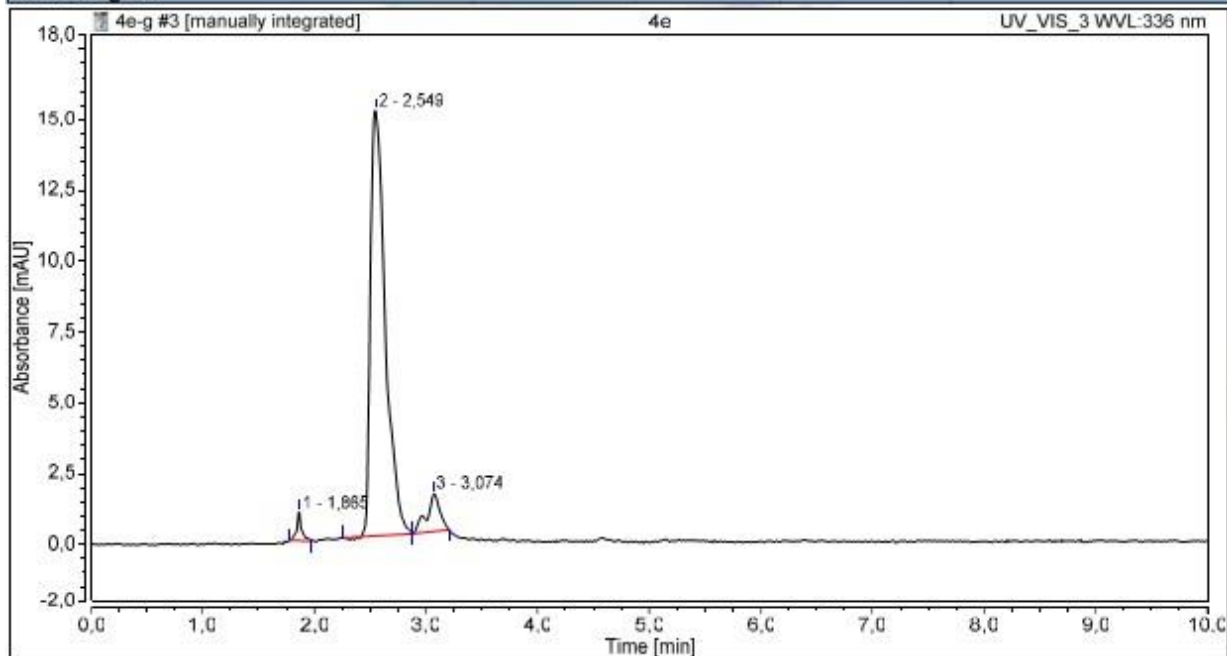

### Integration Results

| No.           | Peak Name | Retention Time<br>min | Area<br>mAU*min | Height<br>mAU | Relative Area<br>% | Relative Height<br>% | Amount<br>n.a. |
|---------------|-----------|-----------------------|-----------------|---------------|--------------------|----------------------|----------------|
| 1             |           | 1,865                 | 0,021           | 0,721         | 0,86               | 4,34                 | n.a.           |
| 2             |           | 2,549                 | 2,319           | 15,040        | 95,85              | 90,50                | n.a.           |
| 3             |           | 3,074                 | 0,080           | 0,858         | 3,29               | 5,16                 | n.a.           |
| <b>Total:</b> |           |                       | <b>2,419</b>    | <b>16,619</b> | <b>100,00</b>      | <b>100,00</b>        |                |

## Chromatogram and Results

### Injection Details

|                      |                                       |                   |          |
|----------------------|---------------------------------------|-------------------|----------|
| Injection Name:      | 4f                                    | Run Time (min):   | 10,00    |
| Vial Number:         | RC3                                   | Injection Volume: | 40,00    |
| Injection Type:      | Unknown                               | Channel:          | UV_VIS_4 |
| Calibration Level:   |                                       | Wavelength:       | 263      |
| Instrument Method:   | Serie 4a-4h_Isocratico_MeOH-ACN_80-20 | Bandwidth:        | n.a.     |
| Processing Method:   | Pureza muestras 130 y 136             | Dilution Factor:  | 1,0000   |
| Injection Date/Time: | 06/oct./22 10:45                      | Sample Weight:    | 1,0000   |

### Chromatogram

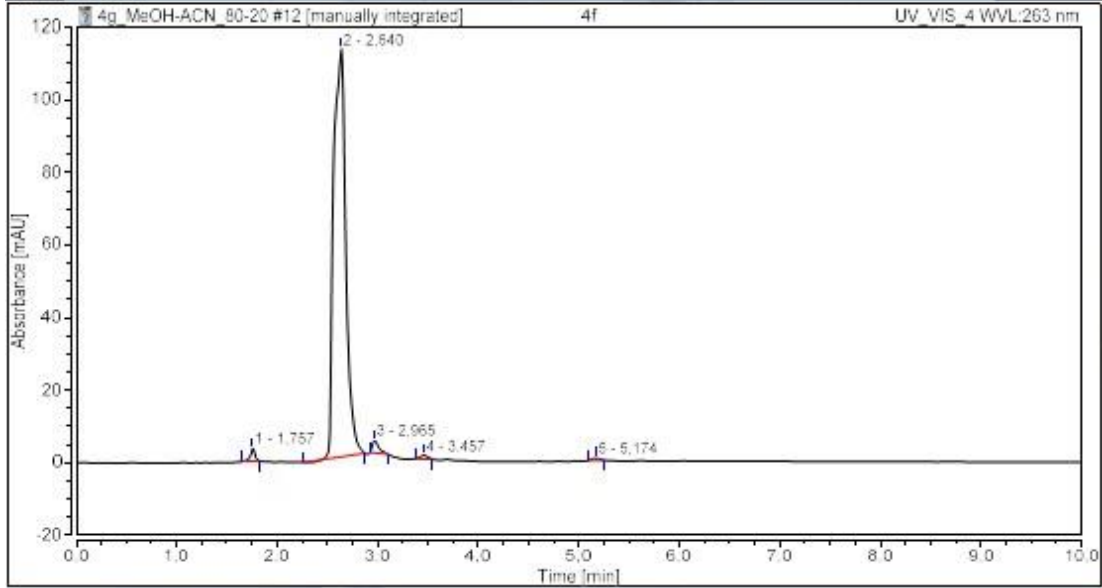

### Integration Results

| No.           | Peak Name | Retention Time<br>min | Area<br>mAU*min | Height<br>mAU  | Relative Area<br>% | Relative Height<br>% | Amount<br>n.a. |
|---------------|-----------|-----------------------|-----------------|----------------|--------------------|----------------------|----------------|
| 1             |           | 1,757                 | 0,174           | 3,460          | 1,07               | 2,87                 | n.a.           |
| 2             |           | 2,640                 | 15,736          | 112,341        | 96,62              | 93,17                | n.a.           |
| 3             |           | 2,965                 | 0,248           | 3,287          | 1,53               | 2,73                 | n.a.           |
| 4             |           | 3,457                 | 0,086           | 0,993          | 0,53               | 0,82                 | n.a.           |
| 5             |           | 5,174                 | 0,042           | 0,493          | 0,26               | 0,41                 | n.a.           |
| <b>Total:</b> |           |                       | <b>16,287</b>   | <b>120,575</b> | <b>100,00</b>      | <b>100,00</b>        |                |



## Chromatogram and Results

### Injection Details

|                      |                                       |                   |          |
|----------------------|---------------------------------------|-------------------|----------|
| Injection Name:      | 4g                                    | Run Time (min):   | 10,00    |
| Vial Number:         | RE3                                   | Injection Volume: | 40,00    |
| Injection Type:      | Unknown                               | Channel:          | UV_VIS_4 |
| Calibration Level:   |                                       | Wavelength:       | 263      |
| Instrument Method:   | Serie 4a-4h_Isocratico_MeOH-ACN_80-20 | Bandwidth:        | n.a.     |
| Processing Method:   | Pureza muestras 130 y 136             | Dilution Factor:  | 1,0000   |
| Injection Date/Time: | 06/oct./22 14:17                      | Sample Weight:    | 1,0000   |

### Chromatogram

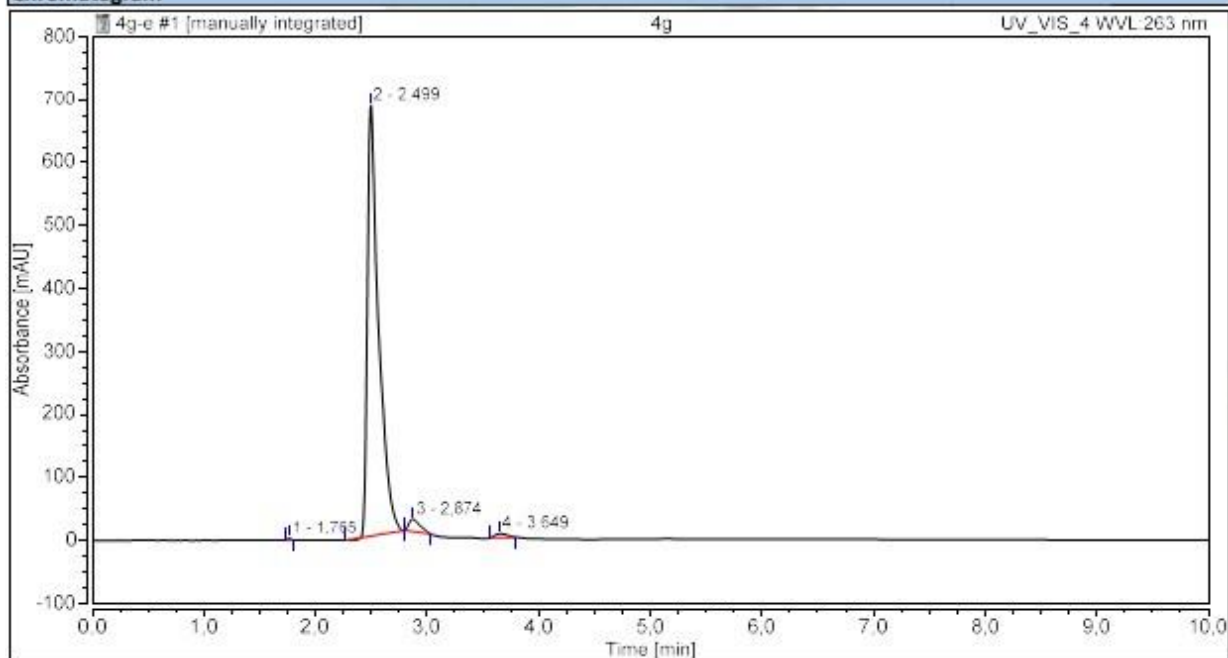

### Integration Results

| No.           | Peak Name | Retention Time<br>min | Area<br>mAU*min | Height<br>mAU  | Relative Area<br>% | Relative Height<br>% | Amount<br>n.a. |
|---------------|-----------|-----------------------|-----------------|----------------|--------------------|----------------------|----------------|
| 1             |           | 1,765                 | 0,104           | 3,151          | 0,13               | 0,44                 | n.a.           |
| 2             |           | 2,499                 | 79,204          | 685,067        | 96,10              | 95,87                | n.a.           |
| 3             |           | 2,874                 | 2,320           | 20,139         | 2,81               | 2,82                 | n.a.           |
| 4             |           | 3,649                 | 0,794           | 6,232          | 0,96               | 0,87                 | n.a.           |
| <b>Total:</b> |           |                       | <b>82,421</b>   | <b>714,589</b> | <b>100,00</b>      | <b>100,00</b>        |                |



## Chromatogram and Results

### Injection Details

|                      |                           |                   |          |
|----------------------|---------------------------|-------------------|----------|
| Injection Name:      | Muestra 4h                | Run Time (min):   | 20,00    |
| Vial Number:         | RA3                       | Injection Volume: | 20,00    |
| Injection Type:      | Unknown                   | Channel:          | UV_VIS_1 |
| Calibration Level:   |                           | Wavelength:       | 324      |
| Instrument Method:   | Muestras 130 y 136        | Bandwidth:        | n.a.     |
| Processing Method:   | Pureza muestras 130 y 136 | Dilution Factor:  | 1,0000   |
| Injection Date/Time: | 30/jun./22 11:01          | Sample Weight:    | 1,0000   |

### Chromatogram

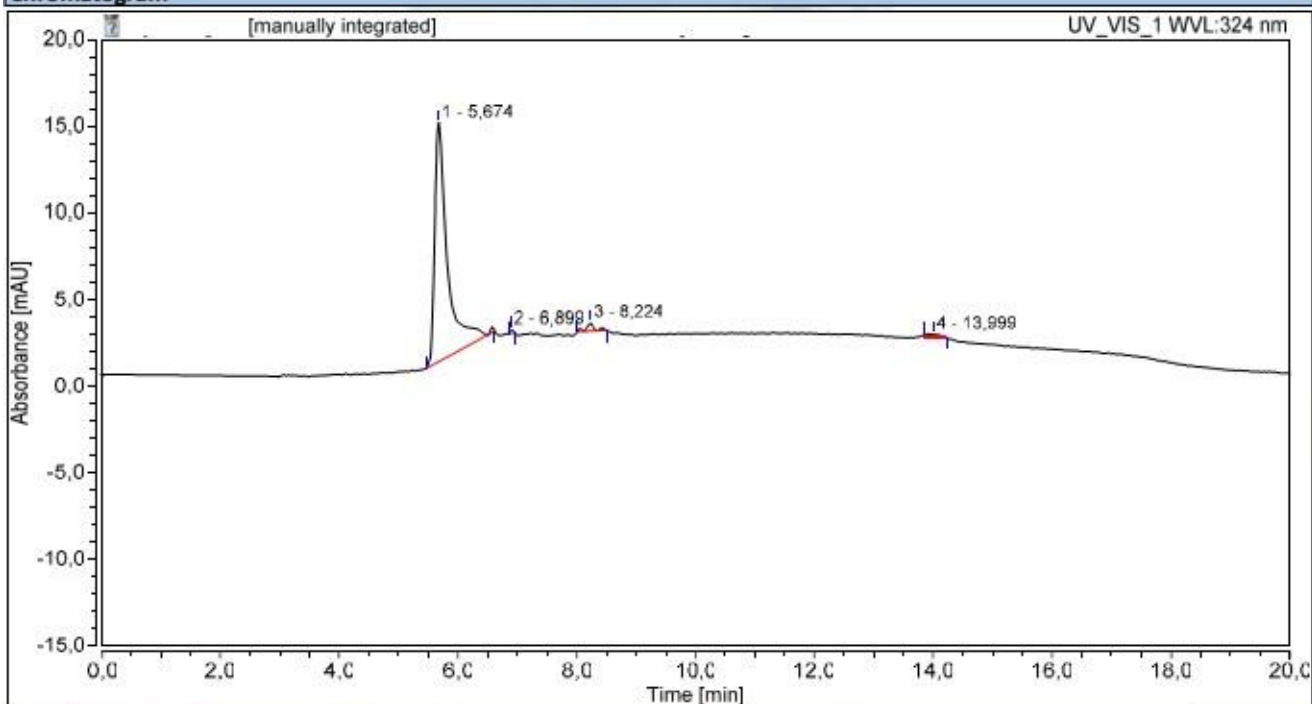

### Integration Results

| No.           | Peak Name | Retention Time<br>min | Area<br>mAU*min | Height<br>mAU | Relative Area<br>% | Relative Height<br>% | Amount |
|---------------|-----------|-----------------------|-----------------|---------------|--------------------|----------------------|--------|
| 1             |           | 5,674                 | 3,433           | 13,811        | 96,79              | 93,93                | n.a.   |
| 2             |           | 6,899                 | 0,013           | 0,235         | 0,36               | 1,60                 | n.a.   |
| 3             |           | 8,224                 | 0,072           | 0,496         | 2,02               | 3,37                 | n.a.   |
| 4             |           | 13,999                | 0,029           | 0,162         | 0,83               | 1,10                 | n.a.   |
| <b>Total:</b> |           |                       | <b>3,547</b>    | <b>14,704</b> | <b>100,00</b>      | <b>100,00</b>        |        |
